# Supplementary material for: A qualitative approach to adsorption mechanism identification on microporous carbonaceous surfaces
Source: Springer Nature journal article supplement (doi:10.1007/s10450-016-9756-2), 2016-01-18
Supplement: MOESM1 [file 7126420]

1728
Molecule
C     1.722100E+01  3.053000E+01  1.610000E+01
C     2.393000E+01  3.053000E+01  1.610000E+01
C     1.722100E+01  3.266200E+01  1.733000E+01
C     2.393000E+01  3.266200E+01  1.733000E+01
C     1.722100E+01  3.479300E+01  1.856100E+01
C     2.393000E+01  3.479300E+01  1.856100E+01
C     1.722100E+01  3.692500E+01  1.979100E+01
C     2.393000E+01  3.692500E+01  1.979100E+01
C     1.722100E+01  3.905600E+01  2.102200E+01
C     2.393000E+01  3.905600E+01  2.102200E+01
C     1.722100E+01  4.118800E+01  2.225300E+01
C     2.393000E+01  4.118800E+01  2.225300E+01
C     1.722100E+01  2.839900E+01  1.733000E+01
C     2.393000E+01  2.839900E+01  1.733000E+01
C     1.722100E+01  3.053000E+01  1.856100E+01
C     2.393000E+01  3.053000E+01  1.856100E+01
C     1.722100E+01  3.266200E+01  1.979100E+01
C     2.393000E+01  3.266200E+01  1.979100E+01
C     1.722100E+01  3.479300E+01  2.102200E+01
C     2.393000E+01  3.479300E+01  2.102200E+01
C     1.722100E+01  3.692500E+01  2.225300E+01
C     2.393000E+01  3.692500E+01  2.225300E+01
C     1.722100E+01  3.905600E+01  2.348300E+01
C     2.393000E+01  3.905600E+01  2.348300E+01
C     1.722100E+01  2.626700E+01  1.856100E+01
C     2.393000E+01  2.626700E+01  1.856100E+01
C     1.722100E+01  2.839900E+01  1.979100E+01
C     2.393000E+01  2.839900E+01  1.979100E+01
C     1.722100E+01  3.053000E+01  2.102200E+01
C     2.393000E+01  3.053000E+01  2.102200E+01
C     1.722100E+01  3.266200E+01  2.225300E+01
C     2.393000E+01  3.266200E+01  2.225300E+01
C     1.722100E+01  3.479300E+01  2.348300E+01
C     2.393000E+01  3.479300E+01  2.348300E+01
C     1.722100E+01  3.692500E+01  2.471400E+01
C     2.393000E+01  3.692500E+01  2.471400E+01
C     1.722100E+01  2.413600E+01  1.979100E+01
C     2.393000E+01  2.413600E+01  1.979100E+01
C     1.722100E+01  2.626700E+01  2.102200E+01
C     2.393000E+01  2.626700E+01  2.102200E+01
C     1.722100E+01  2.839900E+01  2.225300E+01
C     2.393000E+01  2.839900E+01  2.225300E+01
C     1.722100E+01  3.053000E+01  2.348300E+01
C     2.393000E+01  3.053000E+01  2.348300E+01
C     1.722100E+01  3.266200E+01  2.471400E+01
C     2.393000E+01  3.266200E+01  2.471400E+01
C     1.722100E+01  3.479300E+01  2.594400E+01
C     2.393000E+01  3.479300E+01  2.594400E+01
C     1.722100E+01  2.200400E+01  2.102200E+01
C     2.393000E+01  2.200400E+01  2.102200E+01
C     1.722100E+01  2.413600E+01  2.225300E+01
C     2.393000E+01  2.413600E+01  2.225300E+01
C     1.722100E+01  2.626700E+01  2.348300E+01
C     2.393000E+01  2.626700E+01  2.348300E+01
C     1.722100E+01  2.839900E+01  2.471400E+01
C     2.393000E+01  2.839900E+01  2.471400E+01
C     1.722100E+01  3.053000E+01  2.594400E+01
C     2.393000E+01  3.053000E+01  2.594400E+01
C     1.722100E+01  3.266200E+01  2.717500E+01
C     2.393000E+01  3.266200E+01  2.717500E+01
C     1.722100E+01  1.987300E+01  2.225300E+01
C     2.393000E+01  1.987300E+01  2.225300E+01
C     1.722100E+01  2.200400E+01  2.348300E+01
C     2.393000E+01  2.200400E+01  2.348300E+01
C     1.722100E+01  2.413600E+01  2.471400E+01
C     2.393000E+01  2.413600E+01  2.471400E+01
C     1.722100E+01  2.626700E+01  2.594400E+01
C     2.393000E+01  2.626700E+01  2.594400E+01
C     1.722100E+01  2.839900E+01  2.717500E+01
C     2.393000E+01  2.839900E+01  2.717500E+01
C     1.722100E+01  3.053000E+01  2.840600E+01
C     2.393000E+01  3.053000E+01  2.840600E+01
C     2.057500E+01  3.053000E+01  1.610000E+01
C     2.728400E+01  3.053000E+01  1.610000E+01
C     2.057500E+01  3.266200E+01  1.733000E+01
C     2.728400E+01  3.266200E+01  1.733000E+01
C     2.057500E+01  3.479300E+01  1.856100E+01
C     2.728400E+01  3.479300E+01  1.856100E+01
C     2.057500E+01  3.692500E+01  1.979100E+01
C     2.728400E+01  3.692500E+01  1.979100E+01
C     2.057500E+01  3.905600E+01  2.102200E+01
C     2.728400E+01  3.905600E+01  2.102200E+01
C     2.057500E+01  4.118800E+01  2.225300E+01
C     2.728400E+01  4.118800E+01  2.225300E+01
C     2.057500E+01  2.839900E+01  1.733000E+01
C     2.728400E+01  2.839900E+01  1.733000E+01
C     2.057500E+01  3.053000E+01  1.856100E+01
C     2.728400E+01  3.053000E+01  1.856100E+01
C     2.057500E+01  3.266200E+01  1.979100E+01
C     2.728400E+01  3.266200E+01  1.979100E+01
C     2.057500E+01  3.479300E+01  2.102200E+01
C     2.728400E+01  3.479300E+01  2.102200E+01
C     2.057500E+01  3.692500E+01  2.225300E+01
C     2.728400E+01  3.692500E+01  2.225300E+01
C     2.057500E+01  3.905600E+01  2.348300E+01
C     2.728400E+01  3.905600E+01  2.348300E+01
C     2.057500E+01  2.626700E+01  1.856100E+01
C     2.728400E+01  2.626700E+01  1.856100E+01
C     2.057500E+01  2.839900E+01  1.979100E+01
C     2.728400E+01  2.839900E+01  1.979100E+01
C     2.057500E+01  3.053000E+01  2.102200E+01
C     2.728400E+01  3.053000E+01  2.102200E+01
C     2.057500E+01  3.266200E+01  2.225300E+01
C     2.728400E+01  3.266200E+01  2.225300E+01
C     2.057500E+01  3.479300E+01  2.348300E+01
C     2.728400E+01  3.479300E+01  2.348300E+01
C     2.057500E+01  3.692500E+01  2.471400E+01
C     2.728400E+01  3.692500E+01  2.471400E+01
C     2.057500E+01  2.413600E+01  1.979100E+01
C     2.728400E+01  2.413600E+01  1.979100E+01
C     2.057500E+01  2.626700E+01  2.102200E+01
C     2.728400E+01  2.626700E+01  2.102200E+01
C     2.057500E+01  2.839900E+01  2.225300E+01
C     2.728400E+01  2.839900E+01  2.225300E+01
C     2.057500E+01  3.053000E+01  2.348300E+01
C     2.728400E+01  3.053000E+01  2.348300E+01
C     2.057500E+01  3.266200E+01  2.471400E+01
C     2.728400E+01  3.266200E+01  2.471400E+01
C     2.057500E+01  3.479300E+01  2.594400E+01
C     2.728400E+01  3.479300E+01  2.594400E+01
C     2.057500E+01  2.200400E+01  2.102200E+01
C     2.728400E+01  2.200400E+01  2.102200E+01
C     2.057500E+01  2.413600E+01  2.225300E+01
C     2.728400E+01  2.413600E+01  2.225300E+01
C     2.057500E+01  2.626700E+01  2.348300E+01
C     2.728400E+01  2.626700E+01  2.348300E+01
C     2.057500E+01  2.839900E+01  2.471400E+01
C     2.728400E+01  2.839900E+01  2.471400E+01
C     2.057500E+01  3.053000E+01  2.594400E+01
C     2.728400E+01  3.053000E+01  2.594400E+01
C     2.057500E+01  3.266200E+01  2.717500E+01
C     2.728400E+01  3.266200E+01  2.717500E+01
C     2.057500E+01  1.987300E+01  2.225300E+01
C     2.728400E+01  1.987300E+01  2.225300E+01
C     2.057500E+01  2.200400E+01  2.348300E+01
C     2.728400E+01  2.200400E+01  2.348300E+01
C     2.057500E+01  2.413600E+01  2.471400E+01
C     2.728400E+01  2.413600E+01  2.471400E+01
C     2.057500E+01  2.626700E+01  2.594400E+01
C     2.728400E+01  2.626700E+01  2.594400E+01
C     2.057500E+01  2.839900E+01  2.717500E+01
C     2.728400E+01  2.839900E+01  2.717500E+01
C     2.057500E+01  3.053000E+01  2.840600E+01
C     2.728400E+01  3.053000E+01  2.840600E+01
C     1.722100E+01  3.124100E+01  1.733000E+01
C     2.393000E+01  3.124100E+01  1.733000E+01
C     1.722100E+01  3.337200E+01  1.856100E+01
C     2.393000E+01  3.337200E+01  1.856100E+01
C     1.722100E+01  3.550400E+01  1.979100E+01
C     2.393000E+01  3.550400E+01  1.979100E+01
C     1.722100E+01  3.763500E+01  2.102200E+01
C     2.393000E+01  3.763500E+01  2.102200E+01
C     1.722100E+01  3.976700E+01  2.225300E+01
C     2.393000E+01  3.976700E+01  2.225300E+01
C     1.722100E+01  4.189800E+01  2.348300E+01
C     2.393000E+01  4.189800E+01  2.348300E+01
C     1.722100E+01  2.910900E+01  1.856100E+01
C     2.393000E+01  2.910900E+01  1.856100E+01
C     1.722100E+01  3.124100E+01  1.979100E+01
C     2.393000E+01  3.124100E+01  1.979100E+01
C     1.722100E+01  3.337200E+01  2.102200E+01
C     2.393000E+01  3.337200E+01  2.102200E+01
C     1.722100E+01  3.550400E+01  2.225300E+01
C     2.393000E+01  3.550400E+01  2.225300E+01
C     1.722100E+01  3.763500E+01  2.348300E+01
C     2.393000E+01  3.763500E+01  2.348300E+01
C     1.722100E+01  3.976700E+01  2.471400E+01
C     2.393000E+01  3.976700E+01  2.471400E+01
C     1.722100E+01  2.697800E+01  1.979100E+01
C     2.393000E+01  2.697800E+01  1.979100E+01
C     1.722100E+01  2.910900E+01  2.102200E+01
C     2.393000E+01  2.910900E+01  2.102200E+01
C     1.722100E+01  3.124100E+01  2.225300E+01
C     2.393000E+01  3.124100E+01  2.225300E+01
C     1.722100E+01  3.337200E+01  2.348300E+01
C     2.393000E+01  3.337200E+01  2.348300E+01
C     1.722100E+01  3.550400E+01  2.471400E+01
C     2.393000E+01  3.550400E+01  2.471400E+01
C     1.722100E+01  3.763500E+01  2.594400E+01
C     2.393000E+01  3.763500E+01  2.594400E+01
C     1.722100E+01  2.484600E+01  2.102200E+01
C     2.393000E+01  2.484600E+01  2.102200E+01
C     1.722100E+01  2.697800E+01  2.225300E+01
C     2.393000E+01  2.697800E+01  2.225300E+01
C     1.722100E+01  2.910900E+01  2.348300E+01
C     2.393000E+01  2.910900E+01  2.348300E+01
C     1.722100E+01  3.124100E+01  2.471400E+01
C     2.393000E+01  3.124100E+01  2.471400E+01
C     1.722100E+01  3.337200E+01  2.594400E+01
C     2.393000E+01  3.337200E+01  2.594400E+01
C     1.722100E+01  3.550400E+01  2.717500E+01
C     2.393000E+01  3.550400E+01  2.717500E+01
C     1.722100E+01  2.271500E+01  2.225300E+01
C     2.393000E+01  2.271500E+01  2.225300E+01
C     1.722100E+01  2.484600E+01  2.348300E+01
C     2.393000E+01  2.484600E+01  2.348300E+01
C     1.722100E+01  2.697800E+01  2.471400E+01
C     2.393000E+01  2.697800E+01  2.471400E+01
C     1.722100E+01  2.910900E+01  2.594400E+01
C     2.393000E+01  2.910900E+01  2.594400E+01
C     1.722100E+01  3.124100E+01  2.717500E+01
C     2.393000E+01  3.124100E+01  2.717500E+01
C     1.722100E+01  3.337200E+01  2.840600E+01
C     2.393000E+01  3.337200E+01  2.840600E+01
C     1.722100E+01  2.058300E+01  2.348300E+01
C     2.393000E+01  2.058300E+01  2.348300E+01
C     1.722100E+01  2.271500E+01  2.471400E+01
C     2.393000E+01  2.271500E+01  2.471400E+01
C     1.722100E+01  2.484600E+01  2.594400E+01
C     2.393000E+01  2.484600E+01  2.594400E+01
C     1.722100E+01  2.697800E+01  2.717500E+01
C     2.393000E+01  2.697800E+01  2.717500E+01
C     1.722100E+01  2.910900E+01  2.840600E+01
C     2.393000E+01  2.910900E+01  2.840600E+01
C     1.722100E+01  3.124100E+01  2.963600E+01
C     2.393000E+01  3.124100E+01  2.963600E+01
C     2.057500E+01  2.982000E+01  1.733000E+01
C     2.728400E+01  2.982000E+01  1.733000E+01
C     2.057500E+01  3.195100E+01  1.856100E+01
C     2.728400E+01  3.195100E+01  1.856100E+01
C     2.057500E+01  3.408300E+01  1.979100E+01
C     2.728400E+01  3.408300E+01  1.979100E+01
C     2.057500E+01  3.621400E+01  2.102200E+01
C     2.728400E+01  3.621400E+01  2.102200E+01
C     2.057500E+01  3.834600E+01  2.225300E+01
C     2.728400E+01  3.834600E+01  2.225300E+01
C     2.057500E+01  4.047700E+01  2.348300E+01
C     2.728400E+01  4.047700E+01  2.348300E+01
C     2.057500E+01  2.768800E+01  1.856100E+01
C     2.728400E+01  2.768800E+01  1.856100E+01
C     2.057500E+01  2.982000E+01  1.979100E+01
C     2.728400E+01  2.982000E+01  1.979100E+01
C     2.057500E+01  3.195100E+01  2.102200E+01
C     2.728400E+01  3.195100E+01  2.102200E+01
C     2.057500E+01  3.408300E+01  2.225300E+01
C     2.728400E+01  3.408300E+01  2.225300E+01
C     2.057500E+01  3.621400E+01  2.348300E+01
C     2.728400E+01  3.621400E+01  2.348300E+01
C     2.057500E+01  3.834600E+01  2.471400E+01
C     2.728400E+01  3.834600E+01  2.471400E+01
C     2.057500E+01  2.555700E+01  1.979100E+01
C     2.728400E+01  2.555700E+01  1.979100E+01
C     2.057500E+01  2.768800E+01  2.102200E+01
C     2.728400E+01  2.768800E+01  2.102200E+01
C     2.057500E+01  2.982000E+01  2.225300E+01
C     2.728400E+01  2.982000E+01  2.225300E+01
C     2.057500E+01  3.195100E+01  2.348300E+01
C     2.728400E+01  3.195100E+01  2.348300E+01
C     2.057500E+01  3.408300E+01  2.471400E+01
C     2.728400E+01  3.408300E+01  2.471400E+01
C     2.057500E+01  3.621400E+01  2.594400E+01
C     2.728400E+01  3.621400E+01  2.594400E+01
C     2.057500E+01  2.342500E+01  2.102200E+01
C     2.728400E+01  2.342500E+01  2.102200E+01
C     2.057500E+01  2.555700E+01  2.225300E+01
C     2.728400E+01  2.555700E+01  2.225300E+01
C     2.057500E+01  2.768800E+01  2.348300E+01
C     2.728400E+01  2.768800E+01  2.348300E+01
C     2.057500E+01  2.982000E+01  2.471400E+01
C     2.728400E+01  2.982000E+01  2.471400E+01
C     2.057500E+01  3.195100E+01  2.594400E+01
C     2.728400E+01  3.195100E+01  2.594400E+01
C     2.057500E+01  3.408300E+01  2.717500E+01
C     2.728400E+01  3.408300E+01  2.717500E+01
C     2.057500E+01  2.129400E+01  2.225300E+01
C     2.728400E+01  2.129400E+01  2.225300E+01
C     2.057500E+01  2.342500E+01  2.348300E+01
C     2.728400E+01  2.342500E+01  2.348300E+01
C     2.057500E+01  2.555700E+01  2.471400E+01
C     2.728400E+01  2.555700E+01  2.471400E+01
C     2.057500E+01  2.768800E+01  2.594400E+01
C     2.728400E+01  2.768800E+01  2.594400E+01
C     2.057500E+01  2.982000E+01  2.717500E+01
C     2.728400E+01  2.982000E+01  2.717500E+01
C     2.057500E+01  3.195100E+01  2.840600E+01
C     2.728400E+01  3.195100E+01  2.840600E+01
C     2.057500E+01  1.916200E+01  2.348300E+01
C     2.728400E+01  1.916200E+01  2.348300E+01
C     2.057500E+01  2.129400E+01  2.471400E+01
C     2.728400E+01  2.129400E+01  2.471400E+01
C     2.057500E+01  2.342500E+01  2.594400E+01
C     2.728400E+01  2.342500E+01  2.594400E+01
C     2.057500E+01  2.555700E+01  2.717500E+01
C     2.728400E+01  2.555700E+01  2.717500E+01
C     2.057500E+01  2.768800E+01  2.840600E+01
C     2.728400E+01  2.768800E+01  2.840600E+01
C     2.057500E+01  2.982000E+01  2.963600E+01
C     2.728400E+01  2.982000E+01  2.963600E+01
C     1.288200E+01  2.481100E+01  1.939100E+00
C     1.946100E+01  2.505800E+01  6.463800E-01
C     1.302900E+01  2.697600E+01  3.098900E+00
C     1.960700E+01  2.722400E+01  1.806200E+00
C     1.317500E+01  2.914200E+01  4.258700E+00
C     1.975400E+01  2.939000E+01  2.966000E+00
C     1.332200E+01  3.130800E+01  5.418500E+00
C     1.990000E+01  3.155500E+01  4.125700E+00
C     1.346800E+01  3.347400E+01  6.578300E+00
C     2.004700E+01  3.372100E+01  5.285500E+00
C     1.361500E+01  3.564000E+01  7.738100E+00
C     2.019300E+01  3.588700E+01  6.445300E+00
C     1.320700E+01  2.271800E+01  3.193800E+00
C     1.978600E+01  2.296600E+01  1.901000E+00
C     1.335400E+01  2.488400E+01  4.353600E+00
C     1.993300E+01  2.513100E+01  3.060800E+00
C     1.350000E+01  2.705000E+01  5.513400E+00
C     2.007900E+01  2.729700E+01  4.220600E+00
C     1.364700E+01  2.921600E+01  6.673200E+00
C     2.022600E+01  2.946300E+01  5.380400E+00
C     1.379300E+01  3.138200E+01  7.833000E+00
C     2.037200E+01  3.162900E+01  6.540200E+00
C     1.394000E+01  3.354800E+01  8.992800E+00
C     2.051900E+01  3.379500E+01  7.700000E+00
C     1.353300E+01  2.062600E+01  4.448500E+00
C     2.011100E+01  2.087300E+01  3.155700E+00
C     1.367900E+01  2.279200E+01  5.608300E+00
C     2.025800E+01  2.303900E+01  4.315500E+00
C     1.382600E+01  2.495800E+01  6.768100E+00
C     2.040400E+01  2.520500E+01  5.475300E+00
C     1.397200E+01  2.712400E+01  7.927800E+00
C     2.055100E+01  2.737100E+01  6.635100E+00
C     1.411900E+01  2.928900E+01  9.087600E+00
C     2.069700E+01  2.953700E+01  7.794900E+00
C     1.426500E+01  3.145500E+01  1.024700E+01
C     2.084400E+01  3.170300E+01  8.954700E+00
C     1.385800E+01  1.853400E+01  5.703100E+00
C     2.043600E+01  1.878100E+01  4.410400E+00
C     1.400400E+01  2.070000E+01  6.862900E+00
C     2.058300E+01  2.094700E+01  5.570200E+00
C     1.415100E+01  2.286600E+01  8.022700E+00
C     2.072900E+01  2.311300E+01  6.730000E+00
C     1.429700E+01  2.503100E+01  9.182500E+00
C     2.087600E+01  2.527900E+01  7.889700E+00
C     1.444400E+01  2.719700E+01  1.034200E+01
C     2.102200E+01  2.744400E+01  9.049500E+00
C     1.459000E+01  2.936300E+01  1.150200E+01
C     2.116900E+01  2.961000E+01  1.020900E+01
C     1.418300E+01  1.644200E+01  6.957800E+00
C     2.076200E+01  1.668900E+01  5.665000E+00
C     1.432900E+01  1.860700E+01  8.117600E+00
C     2.090800E+01  1.885500E+01  6.824800E+00
C     1.447600E+01  2.077300E+01  9.277400E+00
C     2.105500E+01  2.102000E+01  7.984600E+00
C     1.462200E+01  2.293900E+01  1.043700E+01
C     2.120100E+01  2.318600E+01  9.144400E+00
C     1.476900E+01  2.510500E+01  1.159700E+01
C     2.134800E+01  2.535200E+01  1.030400E+01
C     1.491500E+01  2.727100E+01  1.275700E+01
C     2.149400E+01  2.751800E+01  1.146400E+01
C     1.450800E+01  1.434900E+01  8.212500E+00
C     2.108700E+01  1.459700E+01  6.919700E+00
C     1.465500E+01  1.651500E+01  9.372300E+00
C     2.123300E+01  1.676200E+01  8.079500E+00
C     1.480100E+01  1.868100E+01  1.053200E+01
C     2.138000E+01  1.892800E+01  9.239300E+00
C     1.494800E+01  2.084700E+01  1.169200E+01
C     2.152600E+01  2.109400E+01  1.039900E+01
C     1.509400E+01  2.301300E+01  1.285200E+01
C     2.167300E+01  2.326000E+01  1.155900E+01
C     1.524100E+01  2.517900E+01  1.401100E+01
C     2.181900E+01  2.542600E+01  1.271900E+01
C     1.617200E+01  2.493400E+01  1.292800E+00
C     2.275000E+01  2.518100E+01  0.000000E+00
C     1.631800E+01  2.710000E+01  2.452600E+00
C     2.289700E+01  2.734700E+01  1.159800E+00
C     1.646500E+01  2.926600E+01  3.612300E+00
C     2.304300E+01  2.951300E+01  2.319600E+00
C     1.661100E+01  3.143200E+01  4.772100E+00
C     2.319000E+01  3.167900E+01  3.479400E+00
C     1.675800E+01  3.359800E+01  5.931900E+00
C     2.333600E+01  3.384500E+01  4.639200E+00
C     1.690400E+01  3.576300E+01  7.091700E+00
C     2.348300E+01  3.601100E+01  5.798900E+00
C     1.649700E+01  2.284200E+01  2.547400E+00
C     2.307500E+01  2.308900E+01  1.254700E+00
C     1.664300E+01  2.500800E+01  3.707200E+00
C     2.322200E+01  2.525500E+01  2.414500E+00
C     1.679000E+01  2.717400E+01  4.867000E+00
C     2.336800E+01  2.742100E+01  3.574200E+00
C     1.693600E+01  2.934000E+01  6.026800E+00
C     2.351500E+01  2.958700E+01  4.734000E+00
C     1.708300E+01  3.150500E+01  7.186600E+00
C     2.366100E+01  3.175300E+01  5.893800E+00
C     1.722900E+01  3.367100E+01  8.346400E+00
C     2.380800E+01  3.391800E+01  7.053600E+00
C     1.682200E+01  2.075000E+01  3.802100E+00
C     2.340100E+01  2.099700E+01  2.509300E+00
C     1.696800E+01  2.291600E+01  4.961900E+00
C     2.354700E+01  2.316300E+01  3.669100E+00
C     1.711500E+01  2.508100E+01  6.121700E+00
C     2.369400E+01  2.532900E+01  4.828900E+00
C     1.726100E+01  2.724700E+01  7.281500E+00
C     2.384000E+01  2.749400E+01  5.988700E+00
C     1.740800E+01  2.941300E+01  8.441200E+00
C     2.398700E+01  2.966000E+01  7.148500E+00
C     1.755400E+01  3.157900E+01  9.601000E+00
C     2.413300E+01  3.182600E+01  8.308300E+00
C     1.714700E+01  1.865700E+01  5.056800E+00
C     2.372600E+01  1.890500E+01  3.764000E+00
C     1.729400E+01  2.082300E+01  6.216500E+00
C     2.387200E+01  2.107100E+01  4.923800E+00
C     1.744000E+01  2.298900E+01  7.376300E+00
C     2.401900E+01  2.323600E+01  6.083600E+00
C     1.758700E+01  2.515500E+01  8.536100E+00
C     2.416500E+01  2.540200E+01  7.243400E+00
C     1.773300E+01  2.732100E+01  9.695900E+00
C     2.431200E+01  2.756800E+01  8.403200E+00
C     1.788000E+01  2.948700E+01  1.085600E+01
C     2.445800E+01  2.973400E+01  9.562900E+00
C     1.747200E+01  1.656500E+01  6.311400E+00
C     2.405100E+01  1.681200E+01  5.018700E+00
C     1.761900E+01  1.873100E+01  7.471200E+00
C     2.419700E+01  1.897800E+01  6.178500E+00
C     1.776500E+01  2.089700E+01  8.631000E+00
C     2.434400E+01  2.114400E+01  7.338200E+00
C     1.791200E+01  2.306300E+01  9.790800E+00
C     2.449000E+01  2.331000E+01  8.498000E+00
C     1.805800E+01  2.522900E+01  1.095100E+01
C     2.463700E+01  2.547600E+01  9.657800E+00
C     1.820500E+01  2.739400E+01  1.211000E+01
C     2.478300E+01  2.764200E+01  1.081800E+01
C     1.779700E+01  1.447300E+01  7.566100E+00
C     2.437600E+01  1.472000E+01  6.273300E+00
C     1.794400E+01  1.663900E+01  8.725900E+00
C     2.452300E+01  1.688600E+01  7.433100E+00
C     1.809000E+01  1.880500E+01  9.885700E+00
C     2.466900E+01  1.905200E+01  8.592900E+00
C     1.823700E+01  2.097000E+01  1.104500E+01
C     2.481600E+01  2.121800E+01  9.752700E+00
C     1.838300E+01  2.313600E+01  1.220500E+01
C     2.496200E+01  2.338400E+01  1.091200E+01
C     1.853000E+01  2.530200E+01  1.336500E+01
C     2.510900E+01  2.554900E+01  1.207200E+01
C     1.308800E+01  2.555700E+01  3.130600E+00
C     1.966700E+01  2.580400E+01  1.837800E+00
C     1.323500E+01  2.772300E+01  4.290300E+00
C     1.981300E+01  2.797000E+01  2.997600E+00
C     1.338100E+01  2.988900E+01  5.450100E+00
C     1.996000E+01  3.013600E+01  4.157400E+00
C     1.352800E+01  3.205500E+01  6.609900E+00
C     2.010600E+01  3.230200E+01  5.317200E+00
C     1.367400E+01  3.422000E+01  7.769700E+00
C     2.025300E+01  3.446800E+01  6.477000E+00
C     1.382100E+01  3.638600E+01  8.929500E+00
C     2.039900E+01  3.663400E+01  7.636700E+00
C     1.341300E+01  2.346500E+01  4.385200E+00
C     1.999200E+01  2.371200E+01  3.092500E+00
C     1.356000E+01  2.563100E+01  5.545000E+00
C     2.013900E+01  2.587800E+01  4.252200E+00
C     1.370600E+01  2.779700E+01  6.704800E+00
C     2.028500E+01  2.804400E+01  5.412000E+00
C     1.385300E+01  2.996200E+01  7.864600E+00
C     2.043200E+01  3.021000E+01  6.571800E+00
C     1.399900E+01  3.212800E+01  9.024400E+00
C     2.057800E+01  3.237500E+01  7.731600E+00
C     1.414600E+01  3.429400E+01  1.018400E+01
C     2.072500E+01  3.454100E+01  8.891400E+00
C     1.373900E+01  2.137300E+01  5.639900E+00
C     2.031700E+01  2.162000E+01  4.347100E+00
C     1.388500E+01  2.353800E+01  6.799700E+00
C     2.046400E+01  2.378600E+01  5.506900E+00
C     1.403200E+01  2.570400E+01  7.959500E+00
C     2.061000E+01  2.595200E+01  6.666700E+00
C     1.417800E+01  2.787000E+01  9.119300E+00
C     2.075700E+01  2.811700E+01  7.826500E+00
C     1.432500E+01  3.003600E+01  1.027900E+01
C     2.090300E+01  3.028300E+01  8.986300E+00
C     1.447100E+01  3.220200E+01  1.143900E+01
C     2.105000E+01  3.244900E+01  1.014600E+01
C     1.406400E+01  1.928000E+01  6.894600E+00
C     2.064200E+01  1.952800E+01  5.601800E+00
C     1.421000E+01  2.144600E+01  8.054300E+00
C     2.078900E+01  2.169300E+01  6.761600E+00
C     1.435700E+01  2.361200E+01  9.214100E+00
C     2.093500E+01  2.385900E+01  7.921400E+00
C     1.450300E+01  2.577800E+01  1.037400E+01
C     2.108200E+01  2.602500E+01  9.081200E+00
C     1.465000E+01  2.794400E+01  1.153400E+01
C     2.122800E+01  2.819100E+01  1.024100E+01
C     1.479600E+01  3.011000E+01  1.269300E+01
C     2.137500E+01  3.035700E+01  1.140100E+01
C     1.438900E+01  1.718800E+01  8.149200E+00
C     2.096800E+01  1.743500E+01  6.856500E+00
C     1.453600E+01  1.935400E+01  9.309000E+00
C     2.111400E+01  1.960100E+01  8.016200E+00
C     1.468200E+01  2.152000E+01  1.046900E+01
C     2.126100E+01  2.176700E+01  9.176000E+00
C     1.482900E+01  2.368600E+01  1.162900E+01
C     2.140700E+01  2.393300E+01  1.033600E+01
C     1.497500E+01  2.585100E+01  1.278800E+01
C     2.155400E+01  2.609900E+01  1.149600E+01
C     1.512200E+01  2.801700E+01  1.394800E+01
C     2.170000E+01  2.826500E+01  1.265500E+01
C     1.471400E+01  1.509600E+01  9.403900E+00
C     2.129300E+01  1.534300E+01  8.111100E+00
C     1.486100E+01  1.726200E+01  1.056400E+01
C     2.143900E+01  1.750900E+01  9.270900E+00
C     1.500700E+01  1.942700E+01  1.172300E+01
C     2.158600E+01  1.967500E+01  1.043100E+01
C     1.515400E+01  2.159300E+01  1.288300E+01
C     2.173200E+01  2.184100E+01  1.159000E+01
C     1.530000E+01  2.375900E+01  1.404300E+01
C     2.187900E+01  2.400600E+01  1.275000E+01
C     1.544700E+01  2.592500E+01  1.520300E+01
C     2.202500E+01  2.617200E+01  1.391000E+01
C     1.643700E+01  2.426100E+01  2.515800E+00
C     2.301600E+01  2.450900E+01  1.223000E+00
C     1.658400E+01  2.642700E+01  3.675600E+00
C     2.316200E+01  2.667400E+01  2.382800E+00
C     1.673000E+01  2.859300E+01  4.835400E+00
C     2.330900E+01  2.884000E+01  3.542600E+00
C     1.687700E+01  3.075900E+01  5.995200E+00
C     2.345500E+01  3.100600E+01  4.702400E+00
C     1.702300E+01  3.292500E+01  7.155000E+00
C     2.360200E+01  3.317200E+01  5.862200E+00
C     1.717000E+01  3.509100E+01  8.314700E+00
C     2.374800E+01  3.533800E+01  7.022000E+00
C     1.676200E+01  2.216900E+01  3.770500E+00
C     2.334100E+01  2.241600E+01  2.477700E+00
C     1.690900E+01  2.433500E+01  4.930300E+00
C     2.348700E+01  2.458200E+01  3.637500E+00
C     1.705500E+01  2.650100E+01  6.090000E+00
C     2.363400E+01  2.674800E+01  4.797300E+00
C     1.720200E+01  2.866700E+01  7.249800E+00
C     2.378000E+01  2.891400E+01  5.957100E+00
C     1.734800E+01  3.083200E+01  8.409600E+00
C     2.392700E+01  3.108000E+01  7.116900E+00
C     1.749500E+01  3.299800E+01  9.569400E+00
C     2.407300E+01  3.324600E+01  8.276700E+00
C     1.708800E+01  2.007700E+01  5.025100E+00
C     2.366600E+01  2.032400E+01  3.732400E+00
C     1.723400E+01  2.224300E+01  6.184900E+00
C     2.381300E+01  2.249000E+01  4.892200E+00
C     1.738100E+01  2.440900E+01  7.344700E+00
C     2.395900E+01  2.465600E+01  6.051900E+00
C     1.752700E+01  2.657400E+01  8.504500E+00
C     2.410600E+01  2.682200E+01  7.211700E+00
C     1.767400E+01  2.874000E+01  9.664300E+00
C     2.425200E+01  2.898700E+01  8.371500E+00
C     1.782000E+01  3.090600E+01  1.082400E+01
C     2.439900E+01  3.115300E+01  9.531300E+00
C     1.741300E+01  1.798500E+01  6.279800E+00
C     2.399100E+01  1.823200E+01  4.987000E+00
C     1.755900E+01  2.015000E+01  7.439600E+00
C     2.413800E+01  2.039800E+01  6.146800E+00
C     1.770600E+01  2.231600E+01  8.599400E+00
C     2.428400E+01  2.256300E+01  7.306600E+00
C     1.785200E+01  2.448200E+01  9.759200E+00
C     2.443100E+01  2.472900E+01  8.466400E+00
C     1.799900E+01  2.664800E+01  1.091900E+01
C     2.457700E+01  2.689500E+01  9.626200E+00
C     1.814500E+01  2.881400E+01  1.207900E+01
C     2.472400E+01  2.906100E+01  1.078600E+01
C     1.773800E+01  1.589200E+01  7.534500E+00
C     2.431700E+01  1.614000E+01  6.241700E+00
C     1.788400E+01  1.805800E+01  8.694300E+00
C     2.446300E+01  1.830500E+01  7.401500E+00
C     1.803100E+01  2.022400E+01  9.854000E+00
C     2.461000E+01  2.047100E+01  8.561300E+00
C     1.817700E+01  2.239000E+01  1.101400E+01
C     2.475600E+01  2.263700E+01  9.721100E+00
C     1.832400E+01  2.455600E+01  1.217400E+01
C     2.490300E+01  2.480300E+01  1.088100E+01
C     1.847000E+01  2.672200E+01  1.333300E+01
C     2.504900E+01  2.696900E+01  1.204100E+01
C     1.806300E+01  1.380000E+01  8.789100E+00
C     2.464200E+01  1.404700E+01  7.496400E+00
C     1.821000E+01  1.596600E+01  9.948900E+00
C     2.478800E+01  1.621300E+01  8.656200E+00
C     1.835600E+01  1.813200E+01  1.110900E+01
C     2.493500E+01  1.837900E+01  9.815900E+00
C     1.850300E+01  2.029800E+01  1.226800E+01
C     2.508100E+01  2.054500E+01  1.097600E+01
C     1.864900E+01  2.246300E+01  1.342800E+01
C     2.522800E+01  2.271100E+01  1.213600E+01
C     1.879600E+01  2.462900E+01  1.458800E+01
C     2.537400E+01  2.487700E+01  1.329500E+01
C     3.870200E+00  1.986500E+01  1.446500E+01
C     9.587800E+00  2.337500E+01  1.444000E+01
C     3.111900E+00  2.111400E+01  1.644500E+01
C     8.829500E+00  2.462400E+01  1.642000E+01
C     2.353600E+00  2.236400E+01  1.842500E+01
C     8.071200E+00  2.587400E+01  1.840000E+01
C     1.595300E+00  2.361300E+01  2.040600E+01
C     7.312900E+00  2.712300E+01  2.038000E+01
C     8.370200E-01  2.486300E+01  2.238600E+01
C     6.554600E+00  2.837300E+01  2.236000E+01
C     7.872600E-02  2.611300E+01  2.436600E+01
C     5.796300E+00  2.962200E+01  2.434100E+01
C     5.150600E+00  1.778100E+01  1.474100E+01
C     1.086800E+01  2.129100E+01  1.471500E+01
C     4.392300E+00  1.903100E+01  1.672100E+01
C     1.011000E+01  2.254100E+01  1.669600E+01
C     3.634000E+00  2.028000E+01  1.870100E+01
C     9.351600E+00  2.379000E+01  1.867600E+01
C     2.875700E+00  2.153000E+01  2.068100E+01
C     8.593300E+00  2.504000E+01  2.065600E+01
C     2.117400E+00  2.277900E+01  2.266100E+01
C     7.835000E+00  2.628900E+01  2.263600E+01
C     1.359100E+00  2.402900E+01  2.464200E+01
C     7.076700E+00  2.753900E+01  2.461600E+01
C     6.431000E+00  1.569700E+01  1.501600E+01
C     1.214900E+01  1.920700E+01  1.499100E+01
C     5.672800E+00  1.694700E+01  1.699700E+01
C     1.139000E+01  2.045700E+01  1.697100E+01
C     4.914500E+00  1.819600E+01  1.897700E+01
C     1.063200E+01  2.170600E+01  1.895100E+01
C     4.156200E+00  1.944600E+01  2.095700E+01
C     9.873700E+00  2.295600E+01  2.093200E+01
C     3.397900E+00  2.069500E+01  2.293700E+01
C     9.115400E+00  2.420500E+01  2.291200E+01
C     2.639600E+00  2.194500E+01  2.491700E+01
C     8.357100E+00  2.545500E+01  2.489200E+01
C     7.711500E+00  1.361400E+01  1.529200E+01
C     1.342900E+01  1.712300E+01  1.526700E+01
C     6.953200E+00  1.486300E+01  1.727200E+01
C     1.267100E+01  1.837300E+01  1.724700E+01
C     6.194900E+00  1.611300E+01  1.925200E+01
C     1.191200E+01  1.962300E+01  1.922700E+01
C     5.436600E+00  1.736200E+01  2.123300E+01
C     1.115400E+01  2.087200E+01  2.120700E+01
C     4.678300E+00  1.861200E+01  2.321300E+01
C     1.039600E+01  2.212200E+01  2.318700E+01
C     3.920000E+00  1.986100E+01  2.519300E+01
C     9.637500E+00  2.337100E+01  2.516800E+01
C     8.991900E+00  1.153000E+01  1.556800E+01
C     1.470900E+01  1.504000E+01  1.554200E+01
C     8.233600E+00  1.277900E+01  1.754800E+01
C     1.395100E+01  1.628900E+01  1.752300E+01
C     7.475300E+00  1.402900E+01  1.952800E+01
C     1.319300E+01  1.753900E+01  1.950300E+01
C     6.717000E+00  1.527800E+01  2.150800E+01
C     1.243500E+01  1.878800E+01  2.148300E+01
C     5.958700E+00  1.652800E+01  2.348900E+01
C     1.167600E+01  2.003800E+01  2.346300E+01
C     5.200400E+00  1.777800E+01  2.546900E+01
C     1.091800E+01  2.128700E+01  2.544300E+01
C     1.027200E+01  9.446000E+00  1.584400E+01
C     1.599000E+01  1.295600E+01  1.581800E+01
C     9.514000E+00  1.069600E+01  1.782400E+01
C     1.523200E+01  1.420600E+01  1.779800E+01
C     8.755700E+00  1.194500E+01  1.980400E+01
C     1.447300E+01  1.545500E+01  1.977900E+01
C     7.997400E+00  1.319500E+01  2.178400E+01
C     1.371500E+01  1.670500E+01  2.175900E+01
C     7.239100E+00  1.444400E+01  2.376400E+01
C     1.295700E+01  1.795400E+01  2.373900E+01
C     6.480800E+00  1.569400E+01  2.574400E+01
C     1.219800E+01  1.920400E+01  2.571900E+01
C     6.729000E+00  2.162000E+01  1.445200E+01
C     1.244700E+01  2.513000E+01  1.442700E+01
C     5.970700E+00  2.286900E+01  1.643300E+01
C     1.168800E+01  2.637900E+01  1.640700E+01
C     5.212400E+00  2.411900E+01  1.841300E+01
C     1.093000E+01  2.762900E+01  1.838700E+01
C     4.454100E+00  2.536800E+01  2.039300E+01
C     1.017200E+01  2.887800E+01  2.036700E+01
C     3.695800E+00  2.661800E+01  2.237300E+01
C     9.413300E+00  3.012800E+01  2.234800E+01
C     2.937500E+00  2.786800E+01  2.435300E+01
C     8.655000E+00  3.137700E+01  2.432800E+01
C     8.009400E+00  1.953600E+01  1.472800E+01
C     1.372700E+01  2.304600E+01  1.470300E+01
C     7.251100E+00  2.078600E+01  1.670800E+01
C     1.296900E+01  2.429500E+01  1.668300E+01
C     6.492800E+00  2.203500E+01  1.868800E+01
C     1.221000E+01  2.554500E+01  1.866300E+01
C     5.734500E+00  2.328500E+01  2.066900E+01
C     1.145200E+01  2.679500E+01  2.064300E+01
C     4.976200E+00  2.453400E+01  2.264900E+01
C     1.069400E+01  2.804400E+01  2.262300E+01
C     4.217900E+00  2.578400E+01  2.462900E+01
C     9.935500E+00  2.929400E+01  2.460400E+01
C     9.289800E+00  1.745200E+01  1.500400E+01
C     1.500700E+01  2.096200E+01  1.497800E+01
C     8.531500E+00  1.870200E+01  1.698400E+01
C     1.424900E+01  2.221200E+01  1.695900E+01
C     7.773200E+00  1.995100E+01  1.896400E+01
C     1.349100E+01  2.346100E+01  1.893900E+01
C     7.014900E+00  2.120100E+01  2.094400E+01
C     1.273200E+01  2.471100E+01  2.091900E+01
C     6.256600E+00  2.245000E+01  2.292400E+01
C     1.197400E+01  2.596000E+01  2.289900E+01
C     5.498300E+00  2.370000E+01  2.490500E+01
C     1.121600E+01  2.721000E+01  2.487900E+01
C     1.057000E+01  1.536800E+01  1.527900E+01
C     1.628800E+01  1.887800E+01  1.525400E+01
C     9.811900E+00  1.661800E+01  1.726000E+01
C     1.552900E+01  2.012800E+01  1.723400E+01
C     9.053600E+00  1.786800E+01  1.924000E+01
C     1.477100E+01  2.137800E+01  1.921400E+01
C     8.295300E+00  1.911700E+01  2.122000E+01
C     1.401300E+01  2.262700E+01  2.119500E+01
C     7.537000E+00  2.036700E+01  2.320000E+01
C     1.325500E+01  2.387700E+01  2.317500E+01
C     6.778800E+00  2.161600E+01  2.518000E+01
C     1.249600E+01  2.512600E+01  2.515500E+01
C     1.185100E+01  1.328500E+01  1.555500E+01
C     1.756800E+01  1.679500E+01  1.553000E+01
C     1.109200E+01  1.453400E+01  1.753500E+01
C     1.681000E+01  1.804400E+01  1.751000E+01
C     1.033400E+01  1.578400E+01  1.951600E+01
C     1.605200E+01  1.929400E+01  1.949000E+01
C     9.575800E+00  1.703300E+01  2.149600E+01
C     1.529300E+01  2.054300E+01  2.147000E+01
C     8.817500E+00  1.828300E+01  2.347600E+01
C     1.453500E+01  2.179300E+01  2.345000E+01
C     8.059200E+00  1.953300E+01  2.545600E+01
C     1.377700E+01  2.304200E+01  2.543100E+01
C     1.313100E+01  1.120100E+01  1.583100E+01
C     1.884900E+01  1.471100E+01  1.580500E+01
C     1.237300E+01  1.245100E+01  1.781100E+01
C     1.809000E+01  1.596000E+01  1.778600E+01
C     1.161400E+01  1.370000E+01  1.979100E+01
C     1.733200E+01  1.721000E+01  1.976600E+01
C     1.085600E+01  1.495000E+01  2.177100E+01
C     1.657400E+01  1.846000E+01  2.174600E+01
C     1.009800E+01  1.619900E+01  2.375200E+01
C     1.581500E+01  1.970900E+01  2.372600E+01
C     9.339600E+00  1.744900E+01  2.573200E+01
C     1.505700E+01  2.095900E+01  2.570600E+01
C     3.791500E+00  2.000300E+01  1.587700E+01
C     9.509000E+00  2.351300E+01  1.585200E+01
C     3.033200E+00  2.125300E+01  1.785700E+01
C     8.750700E+00  2.476300E+01  1.783200E+01
C     2.274900E+00  2.250200E+01  1.983700E+01
C     7.992400E+00  2.601200E+01  1.981200E+01
C     1.516600E+00  2.375200E+01  2.181800E+01
C     7.234100E+00  2.726200E+01  2.179200E+01
C     7.583000E-01  2.500100E+01  2.379800E+01
C     6.475800E+00  2.851100E+01  2.377200E+01
C     0.000000E+00  2.625100E+01  2.577800E+01
C     5.717500E+00  2.976100E+01  2.575300E+01
C     5.071900E+00  1.791900E+01  1.615300E+01
C     1.078900E+01  2.142900E+01  1.612700E+01
C     4.313600E+00  1.916900E+01  1.813300E+01
C     1.003100E+01  2.267900E+01  1.810800E+01
C     3.555300E+00  2.041900E+01  2.011300E+01
C     9.272900E+00  2.392900E+01  2.008800E+01
C     2.797000E+00  2.166800E+01  2.209300E+01
C     8.514600E+00  2.517800E+01  2.206800E+01
C     2.038700E+00  2.291800E+01  2.407300E+01
C     7.756300E+00  2.642800E+01  2.404800E+01
C     1.280400E+00  2.416700E+01  2.605400E+01
C     6.998000E+00  2.767700E+01  2.602800E+01
C     6.352300E+00  1.583600E+01  1.642800E+01
C     1.207000E+01  1.934600E+01  1.640300E+01
C     5.594000E+00  1.708500E+01  1.840900E+01
C     1.131200E+01  2.059500E+01  1.838300E+01
C     4.835700E+00  1.833500E+01  2.038900E+01
C     1.055300E+01  2.184500E+01  2.036300E+01
C     4.077400E+00  1.958400E+01  2.236900E+01
C     9.795000E+00  2.309400E+01  2.234400E+01
C     3.319100E+00  2.083400E+01  2.434900E+01
C     9.036700E+00  2.434400E+01  2.432400E+01
C     2.560800E+00  2.208400E+01  2.632900E+01
C     8.278400E+00  2.559300E+01  2.630400E+01
C     7.632700E+00  1.375200E+01  1.670400E+01
C     1.335000E+01  1.726200E+01  1.667900E+01
C     6.874400E+00  1.500200E+01  1.868400E+01
C     1.259200E+01  1.851100E+01  1.865900E+01
C     6.116100E+00  1.625100E+01  2.066500E+01
C     1.183400E+01  1.976100E+01  2.063900E+01
C     5.357800E+00  1.750100E+01  2.264500E+01
C     1.107500E+01  2.101100E+01  2.261900E+01
C     4.599500E+00  1.875000E+01  2.462500E+01
C     1.031700E+01  2.226000E+01  2.459900E+01
C     3.841300E+00  2.000000E+01  2.660500E+01
C     9.558800E+00  2.351000E+01  2.658000E+01
C     8.913200E+00  1.166800E+01  1.698000E+01
C     1.463100E+01  1.517800E+01  1.695400E+01
C     8.154900E+00  1.291800E+01  1.896000E+01
C     1.387200E+01  1.642800E+01  1.893500E+01
C     7.396600E+00  1.416700E+01  2.094000E+01
C     1.311400E+01  1.767700E+01  2.091500E+01
C     6.638300E+00  1.541700E+01  2.292000E+01
C     1.235600E+01  1.892700E+01  2.289500E+01
C     5.880000E+00  1.666600E+01  2.490100E+01
C     1.159800E+01  2.017600E+01  2.487500E+01
C     5.121700E+00  1.791600E+01  2.688100E+01
C     1.083900E+01  2.142600E+01  2.685500E+01
C     1.019400E+01  9.584500E+00  1.725600E+01
C     1.591100E+01  1.309400E+01  1.723000E+01
C     9.435300E+00  1.083400E+01  1.923600E+01
C     1.515300E+01  1.434400E+01  1.921000E+01
C     8.677000E+00  1.208400E+01  2.121600E+01
C     1.439500E+01  1.559400E+01  2.119100E+01
C     7.918700E+00  1.333300E+01  2.319600E+01
C     1.363600E+01  1.684300E+01  2.317100E+01
C     7.160400E+00  1.458300E+01  2.517600E+01
C     1.287800E+01  1.809300E+01  2.515100E+01
C     6.402100E+00  1.583200E+01  2.715600E+01
C     1.212000E+01  1.934200E+01  2.713100E+01
C     7.329800E+00  2.064700E+01  1.529600E+01
C     1.304700E+01  2.415700E+01  1.527100E+01
C     6.571500E+00  2.189700E+01  1.727600E+01
C     1.228900E+01  2.540700E+01  1.725100E+01
C     5.813200E+00  2.314600E+01  1.925700E+01
C     1.153100E+01  2.665600E+01  1.923100E+01
C     5.054900E+00  2.439600E+01  2.123700E+01
C     1.077200E+01  2.790600E+01  2.121100E+01
C     4.296600E+00  2.564500E+01  2.321700E+01
C     1.001400E+01  2.915500E+01  2.319200E+01
C     3.538300E+00  2.689500E+01  2.519700E+01
C     9.255900E+00  3.040500E+01  2.517200E+01
C     8.610300E+00  1.856300E+01  1.557200E+01
C     1.432800E+01  2.207300E+01  1.554700E+01
C     7.852000E+00  1.981300E+01  1.755200E+01
C     1.357000E+01  2.332300E+01  1.752700E+01
C     7.093700E+00  2.106200E+01  1.953200E+01
C     1.281100E+01  2.457200E+01  1.950700E+01
C     6.335400E+00  2.231200E+01  2.151200E+01
C     1.205300E+01  2.582200E+01  2.148700E+01
C     5.577100E+00  2.356200E+01  2.349300E+01
C     1.129500E+01  2.707200E+01  2.346700E+01
C     4.818800E+00  2.481100E+01  2.547300E+01
C     1.053600E+01  2.832100E+01  2.544700E+01
C     9.890700E+00  1.648000E+01  1.584800E+01
C     1.560800E+01  1.999000E+01  1.582200E+01
C     9.132400E+00  1.772900E+01  1.782800E+01
C     1.485000E+01  2.123900E+01  1.780200E+01
C     8.374100E+00  1.897900E+01  1.980800E+01
C     1.409200E+01  2.248900E+01  1.978300E+01
C     7.615800E+00  2.022800E+01  2.178800E+01
C     1.333300E+01  2.373800E+01  2.176300E+01
C     6.857500E+00  2.147800E+01  2.376800E+01
C     1.257500E+01  2.498800E+01  2.374300E+01
C     6.099200E+00  2.272700E+01  2.574800E+01
C     1.181700E+01  2.623700E+01  2.572300E+01
C     1.117100E+01  1.439600E+01  1.612300E+01
C     1.688900E+01  1.790600E+01  1.609800E+01
C     1.041300E+01  1.564500E+01  1.810300E+01
C     1.613000E+01  1.915500E+01  1.807800E+01
C     9.654500E+00  1.689500E+01  2.008400E+01
C     1.537200E+01  2.040500E+01  2.005800E+01
C     8.896200E+00  1.814500E+01  2.206400E+01
C     1.461400E+01  2.165400E+01  2.203800E+01
C     8.137900E+00  1.939400E+01  2.404400E+01
C     1.385500E+01  2.290400E+01  2.401900E+01
C     7.379600E+00  2.064400E+01  2.602400E+01
C     1.309700E+01  2.415400E+01  2.599900E+01
C     1.245200E+01  1.231200E+01  1.639900E+01
C     1.816900E+01  1.582200E+01  1.637400E+01
C     1.169300E+01  1.356200E+01  1.837900E+01
C     1.741100E+01  1.707200E+01  1.835400E+01
C     1.093500E+01  1.481100E+01  2.035900E+01
C     1.665200E+01  1.832100E+01  2.033400E+01
C     1.017700E+01  1.606100E+01  2.234000E+01
C     1.589400E+01  1.957100E+01  2.231400E+01
C     9.418300E+00  1.731000E+01  2.432000E+01
C     1.513600E+01  2.082000E+01  2.429400E+01
C     8.660000E+00  1.856000E+01  2.630000E+01
C     1.437800E+01  2.207000E+01  2.627500E+01
C     1.373200E+01  1.022800E+01  1.667500E+01
C     1.944900E+01  1.373800E+01  1.664900E+01
C     1.297400E+01  1.147800E+01  1.865500E+01
C     1.869100E+01  1.498800E+01  1.863000E+01
C     1.221500E+01  1.272700E+01  2.063500E+01
C     1.793300E+01  1.623700E+01  2.061000E+01
C     1.145700E+01  1.397700E+01  2.261500E+01
C     1.717500E+01  1.748700E+01  2.259000E+01
C     1.069900E+01  1.522700E+01  2.459500E+01
C     1.641600E+01  1.873700E+01  2.457000E+01
C     9.940400E+00  1.647600E+01  2.657600E+01
C     1.565800E+01  1.998600E+01  2.655000E+01
C     4.425300E+00  4.167600E+01  8.809800E+00
C     1.077700E+01  3.980900E+01  7.721600E+00
C     5.217700E+00  4.369400E+01  9.973500E+00
C     1.156900E+01  4.182800E+01  8.885300E+00
C     6.010200E+00  4.571300E+01  1.113700E+01
C     1.236200E+01  4.384700E+01  1.004900E+01
C     6.802700E+00  4.773200E+01  1.230100E+01
C     1.315400E+01  4.586600E+01  1.121300E+01
C     7.595100E+00  4.975000E+01  1.346500E+01
C     1.394700E+01  4.788400E+01  1.237600E+01
C     8.387600E+00  5.176900E+01  1.462800E+01
C     1.473900E+01  4.990300E+01  1.354000E+01
C     4.032300E+00  3.960100E+01  1.007400E+01
C     1.038400E+01  3.773500E+01  8.985800E+00
C     4.824700E+00  4.161900E+01  1.123800E+01
C     1.117600E+01  3.975300E+01  1.014900E+01
C     5.617200E+00  4.363800E+01  1.240100E+01
C     1.196900E+01  4.177200E+01  1.131300E+01
C     6.409700E+00  4.565700E+01  1.356500E+01
C     1.276100E+01  4.379100E+01  1.247700E+01
C     7.202100E+00  4.767600E+01  1.472900E+01
C     1.355400E+01  4.581000E+01  1.364100E+01
C     7.994600E+00  4.969400E+01  1.589300E+01
C     1.434600E+01  4.782800E+01  1.480400E+01
C     3.639300E+00  3.752600E+01  1.133800E+01
C     9.991000E+00  3.566000E+01  1.025000E+01
C     4.431700E+00  3.954500E+01  1.250200E+01
C     1.078300E+01  3.767900E+01  1.141400E+01
C     5.224200E+00  4.156300E+01  1.366600E+01
C     1.157600E+01  3.969700E+01  1.257700E+01
C     6.016700E+00  4.358200E+01  1.482900E+01
C     1.236800E+01  4.171600E+01  1.374100E+01
C     6.809200E+00  4.560100E+01  1.599300E+01
C     1.316100E+01  4.373500E+01  1.490500E+01
C     7.601600E+00  4.762000E+01  1.715700E+01
C     1.395300E+01  4.575300E+01  1.606900E+01
C     3.246300E+00  3.545100E+01  1.260200E+01
C     9.598000E+00  3.358500E+01  1.151400E+01
C     4.038800E+00  3.747000E+01  1.376600E+01
C     1.039000E+01  3.560400E+01  1.267800E+01
C     4.831200E+00  3.948900E+01  1.493000E+01
C     1.118300E+01  3.762200E+01  1.384200E+01
C     5.623700E+00  4.150700E+01  1.609400E+01
C     1.197500E+01  3.964100E+01  1.500500E+01
C     6.416200E+00  4.352600E+01  1.725700E+01
C     1.276800E+01  4.166000E+01  1.616900E+01
C     7.208600E+00  4.554500E+01  1.842100E+01
C     1.356000E+01  4.367900E+01  1.733300E+01
C     2.853300E+00  3.337600E+01  1.386700E+01
C     9.205000E+00  3.151000E+01  1.277800E+01
C     3.645800E+00  3.539500E+01  1.503000E+01
C     9.997500E+00  3.352900E+01  1.394200E+01
C     4.438200E+00  3.741400E+01  1.619400E+01
C     1.079000E+01  3.554800E+01  1.510600E+01
C     5.230700E+00  3.943200E+01  1.735800E+01
C     1.158200E+01  3.756600E+01  1.627000E+01
C     6.023200E+00  4.145100E+01  1.852100E+01
C     1.237500E+01  3.958500E+01  1.743300E+01
C     6.815600E+00  4.347000E+01  1.968500E+01
C     1.316700E+01  4.160400E+01  1.859700E+01
C     2.460300E+00  3.130100E+01  1.513100E+01
C     8.812000E+00  2.943500E+01  1.404300E+01
C     3.252800E+00  3.332000E+01  1.629400E+01
C     9.604500E+00  3.145400E+01  1.520600E+01
C     4.045200E+00  3.533900E+01  1.745800E+01
C     1.039700E+01  3.347300E+01  1.637000E+01
C     4.837700E+00  3.735800E+01  1.862200E+01
C     1.118900E+01  3.549100E+01  1.753400E+01
C     5.630200E+00  3.937600E+01  1.978600E+01
C     1.198200E+01  3.751000E+01  1.869700E+01
C     6.422700E+00  4.139500E+01  2.094900E+01
C     1.277400E+01  3.952900E+01  1.986100E+01
C     7.601100E+00  4.074300E+01  8.265700E+00
C     1.395300E+01  3.887600E+01  7.177500E+00
C     8.393600E+00  4.276100E+01  9.429400E+00
C     1.474500E+01  4.089500E+01  8.341200E+00
C     9.186100E+00  4.478000E+01  1.059300E+01
C     1.553800E+01  4.291400E+01  9.504900E+00
C     9.978500E+00  4.679900E+01  1.175700E+01
C     1.633000E+01  4.493300E+01  1.066900E+01
C     1.077100E+01  4.881700E+01  1.292100E+01
C     1.712300E+01  4.695100E+01  1.183200E+01
C     1.156300E+01  5.083600E+01  1.408400E+01
C     1.791500E+01  4.897000E+01  1.299600E+01
C     7.208100E+00  3.866800E+01  9.529900E+00
C     1.356000E+01  3.680200E+01  8.441700E+00
C     8.000600E+00  4.068600E+01  1.069400E+01
C     1.435200E+01  3.882000E+01  9.605400E+00
C     8.793100E+00  4.270500E+01  1.185700E+01
C     1.514500E+01  4.083900E+01  1.076900E+01
C     9.585500E+00  4.472400E+01  1.302100E+01
C     1.593700E+01  4.285800E+01  1.193300E+01
C     1.037800E+01  4.674300E+01  1.418500E+01
C     1.673000E+01  4.487600E+01  1.309700E+01
C     1.117000E+01  4.876100E+01  1.534900E+01
C     1.752200E+01  4.689500E+01  1.426000E+01
C     6.815100E+00  3.659300E+01  1.079400E+01
C     1.316700E+01  3.472700E+01  9.705800E+00
C     7.607600E+00  3.861200E+01  1.195800E+01
C     1.395900E+01  3.674500E+01  1.087000E+01
C     8.400100E+00  4.063000E+01  1.312200E+01
C     1.475200E+01  3.876400E+01  1.203300E+01
C     9.192500E+00  4.264900E+01  1.428500E+01
C     1.554400E+01  4.078300E+01  1.319700E+01
C     9.985000E+00  4.466800E+01  1.544900E+01
C     1.633700E+01  4.280200E+01  1.436100E+01
C     1.077700E+01  4.668600E+01  1.661300E+01
C     1.712900E+01  4.482000E+01  1.552400E+01
C     6.422100E+00  3.451800E+01  1.205800E+01
C     1.277400E+01  3.265200E+01  1.097000E+01
C     7.214600E+00  3.653700E+01  1.322200E+01
C     1.356600E+01  3.467100E+01  1.213400E+01
C     8.007100E+00  3.855500E+01  1.438600E+01
C     1.435900E+01  3.668900E+01  1.329700E+01
C     8.799600E+00  4.057400E+01  1.554900E+01
C     1.515100E+01  3.870800E+01  1.446100E+01
C     9.592000E+00  4.259300E+01  1.671300E+01
C     1.594400E+01  4.072700E+01  1.562500E+01
C     1.038400E+01  4.461200E+01  1.787700E+01
C     1.673600E+01  4.274600E+01  1.678900E+01
C     6.029200E+00  3.244300E+01  1.332200E+01
C     1.238100E+01  3.057700E+01  1.223400E+01
C     6.821600E+00  3.446200E+01  1.448600E+01
C     1.317300E+01  3.259600E+01  1.339800E+01
C     7.614100E+00  3.648100E+01  1.565000E+01
C     1.396600E+01  3.461500E+01  1.456200E+01
C     8.406600E+00  3.849900E+01  1.681400E+01
C     1.475800E+01  3.663300E+01  1.572500E+01
C     9.199000E+00  4.051800E+01  1.797700E+01
C     1.555100E+01  3.865200E+01  1.688900E+01
C     9.991500E+00  4.253700E+01  1.914100E+01
C     1.634300E+01  4.067100E+01  1.805300E+01
C     5.636200E+00  3.036800E+01  1.458700E+01
C     1.198800E+01  2.850200E+01  1.349800E+01
C     6.428600E+00  3.238700E+01  1.575000E+01
C     1.278000E+01  3.052100E+01  1.466200E+01
C     7.221100E+00  3.440600E+01  1.691400E+01
C     1.357300E+01  3.254000E+01  1.582600E+01
C     8.013600E+00  3.642500E+01  1.807800E+01
C     1.436500E+01  3.455800E+01  1.699000E+01
C     8.806000E+00  3.844300E+01  1.924200E+01
C     1.515800E+01  3.657700E+01  1.815300E+01
C     9.598500E+00  4.046200E+01  2.040500E+01
C     1.595000E+01  3.859600E+01  1.931700E+01
C     4.822600E+00  4.233000E+01  1.000700E+01
C     1.117400E+01  4.046400E+01  8.918800E+00
C     5.615000E+00  4.434800E+01  1.117100E+01
C     1.196700E+01  4.248200E+01  1.008300E+01
C     6.407500E+00  4.636700E+01  1.233400E+01
C     1.275900E+01  4.450100E+01  1.124600E+01
C     7.200000E+00  4.838600E+01  1.349800E+01
C     1.355200E+01  4.652000E+01  1.241000E+01
C     7.992500E+00  5.040500E+01  1.466200E+01
C     1.434400E+01  4.853900E+01  1.357400E+01
C     8.784900E+00  5.242300E+01  1.582600E+01
C     1.513700E+01  5.055700E+01  1.473700E+01
C     4.429600E+00  4.025500E+01  1.127100E+01
C     1.078100E+01  3.838900E+01  1.018300E+01
C     5.222100E+00  4.227400E+01  1.243500E+01
C     1.157400E+01  4.040800E+01  1.134700E+01
C     6.014500E+00  4.429200E+01  1.359900E+01
C     1.236600E+01  4.242600E+01  1.251000E+01
C     6.807000E+00  4.631100E+01  1.476200E+01
C     1.315900E+01  4.444500E+01  1.367400E+01
C     7.599500E+00  4.833000E+01  1.592600E+01
C     1.395100E+01  4.646400E+01  1.483800E+01
C     8.391900E+00  5.034900E+01  1.709000E+01
C     1.474400E+01  4.848200E+01  1.600200E+01
C     4.036600E+00  3.818000E+01  1.253500E+01
C     1.038800E+01  3.631400E+01  1.144700E+01
C     4.829100E+00  4.019900E+01  1.369900E+01
C     1.118100E+01  3.833300E+01  1.261100E+01
C     5.621500E+00  4.221800E+01  1.486300E+01
C     1.197300E+01  4.035100E+01  1.377500E+01
C     6.414000E+00  4.423600E+01  1.602700E+01
C     1.276600E+01  4.237000E+01  1.493800E+01
C     7.206500E+00  4.625500E+01  1.719000E+01
C     1.355800E+01  4.438900E+01  1.610200E+01
C     7.998900E+00  4.827400E+01  1.835400E+01
C     1.435100E+01  4.640800E+01  1.726600E+01
C     3.643600E+00  3.610500E+01  1.380000E+01
C     9.995300E+00  3.423900E+01  1.271100E+01
C     4.436100E+00  3.812400E+01  1.496300E+01
C     1.078800E+01  3.625800E+01  1.387500E+01
C     5.228500E+00  4.014300E+01  1.612700E+01
C     1.158000E+01  3.827700E+01  1.503900E+01
C     6.021000E+00  4.216100E+01  1.729100E+01
C     1.237300E+01  4.029500E+01  1.620300E+01
C     6.813500E+00  4.418000E+01  1.845400E+01
C     1.316500E+01  4.231400E+01  1.736600E+01
C     7.606000E+00  4.619900E+01  1.961800E+01
C     1.395800E+01  4.433300E+01  1.853000E+01
C     3.250600E+00  3.403000E+01  1.506400E+01
C     9.602300E+00  3.216400E+01  1.397600E+01
C     4.043100E+00  3.604900E+01  1.622700E+01
C     1.039500E+01  3.418300E+01  1.513900E+01
C     4.835600E+00  3.806800E+01  1.739100E+01
C     1.118700E+01  3.620200E+01  1.630300E+01
C     5.628000E+00  4.008700E+01  1.855500E+01
C     1.198000E+01  3.822100E+01  1.746700E+01
C     6.420500E+00  4.210500E+01  1.971900E+01
C     1.277200E+01  4.023900E+01  1.863000E+01
C     7.213000E+00  4.412400E+01  2.088200E+01
C     1.356500E+01  4.225800E+01  1.979400E+01
C     2.857600E+00  3.195600E+01  1.632800E+01
C     9.209300E+00  3.009000E+01  1.524000E+01
C     3.650100E+00  3.397400E+01  1.749200E+01
C     1.000200E+01  3.210800E+01  1.640300E+01
C     4.442600E+00  3.599300E+01  1.865500E+01
C     1.079400E+01  3.412700E+01  1.756700E+01
C     5.235000E+00  3.801200E+01  1.981900E+01
C     1.158700E+01  3.614600E+01  1.873100E+01
C     6.027500E+00  4.003100E+01  2.098300E+01
C     1.237900E+01  3.816400E+01  1.989500E+01
C     6.820000E+00  4.204900E+01  2.214700E+01
C     1.317200E+01  4.018300E+01  2.105800E+01
C     7.603300E+00  4.003200E+01  9.496400E+00
C     1.395500E+01  3.816600E+01  8.408200E+00
C     8.395700E+00  4.205100E+01  1.066000E+01
C     1.474700E+01  4.018500E+01  9.571900E+00
C     9.188200E+00  4.407000E+01  1.182400E+01
C     1.554000E+01  4.220400E+01  1.073600E+01
C     9.980700E+00  4.608800E+01  1.298800E+01
C     1.633200E+01  4.422200E+01  1.189900E+01
C     1.077300E+01  4.810700E+01  1.415100E+01
C     1.712500E+01  4.624100E+01  1.306300E+01
C     1.156600E+01  5.012600E+01  1.531500E+01
C     1.791700E+01  4.826000E+01  1.422700E+01
C     7.210300E+00  3.795700E+01  1.076100E+01
C     1.356200E+01  3.609100E+01  9.672400E+00
C     8.002800E+00  3.997600E+01  1.192400E+01
C     1.435400E+01  3.811000E+01  1.083600E+01
C     8.795200E+00  4.199500E+01  1.308800E+01
C     1.514700E+01  4.012900E+01  1.200000E+01
C     9.587700E+00  4.401400E+01  1.425200E+01
C     1.593900E+01  4.214700E+01  1.316400E+01
C     1.038000E+01  4.603200E+01  1.541500E+01
C     1.673200E+01  4.416600E+01  1.432700E+01
C     1.117300E+01  4.805100E+01  1.657900E+01
C     1.752400E+01  4.618500E+01  1.549100E+01
C     6.817300E+00  3.588300E+01  1.202500E+01
C     1.316900E+01  3.401600E+01  1.093700E+01
C     7.609800E+00  3.790100E+01  1.318800E+01
C     1.396100E+01  3.603500E+01  1.210000E+01
C     8.402200E+00  3.992000E+01  1.435200E+01
C     1.475400E+01  3.805400E+01  1.326400E+01
C     9.194700E+00  4.193900E+01  1.551600E+01
C     1.554600E+01  4.007300E+01  1.442800E+01
C     9.987200E+00  4.395700E+01  1.668000E+01
C     1.633900E+01  4.209100E+01  1.559100E+01
C     1.078000E+01  4.597600E+01  1.784300E+01
C     1.713100E+01  4.411000E+01  1.675500E+01
C     6.424300E+00  3.380800E+01  1.328900E+01
C     1.277600E+01  3.194200E+01  1.220100E+01
C     7.216800E+00  3.582600E+01  1.445300E+01
C     1.356800E+01  3.396000E+01  1.336400E+01
C     8.009200E+00  3.784500E+01  1.561600E+01
C     1.436100E+01  3.597900E+01  1.452800E+01
C     8.801700E+00  3.986400E+01  1.678000E+01
C     1.515300E+01  3.799800E+01  1.569200E+01
C     9.594200E+00  4.188300E+01  1.794400E+01
C     1.594600E+01  4.001600E+01  1.685600E+01
C     1.038700E+01  4.390100E+01  1.910800E+01
C     1.673800E+01  4.203500E+01  1.801900E+01
C     6.031300E+00  3.173300E+01  1.455300E+01
C     1.238300E+01  2.986700E+01  1.346500E+01
C     6.823800E+00  3.375200E+01  1.571700E+01
C     1.317500E+01  3.188600E+01  1.462900E+01
C     7.616300E+00  3.577000E+01  1.688100E+01
C     1.396800E+01  3.390400E+01  1.579200E+01
C     8.408700E+00  3.778900E+01  1.804400E+01
C     1.476000E+01  3.592300E+01  1.695600E+01
C     9.201200E+00  3.980800E+01  1.920800E+01
C     1.555300E+01  3.794200E+01  1.812000E+01
C     9.993700E+00  4.182700E+01  2.037200E+01
C     1.634500E+01  3.996000E+01  1.928400E+01
C     5.638300E+00  2.965800E+01  1.581700E+01
C     1.199000E+01  2.779200E+01  1.472900E+01
C     6.430800E+00  3.167700E+01  1.698100E+01
C     1.278200E+01  2.981100E+01  1.589300E+01
C     7.223300E+00  3.369600E+01  1.814500E+01
C     1.357500E+01  3.182900E+01  1.705700E+01
C     8.015700E+00  3.571400E+01  1.930800E+01
C     1.436700E+01  3.384800E+01  1.822000E+01
C     8.808200E+00  3.773300E+01  2.047200E+01
C     1.516000E+01  3.586700E+01  1.938400E+01
C     9.600700E+00  3.975200E+01  2.163600E+01
C     1.595200E+01  3.788600E+01  2.054800E+01
C     2.001600E+01  3.861200E+01  1.643000E+01
C     1.724800E+01  4.447100E+01  1.469100E+01
C     2.146300E+01  3.977500E+01  1.804600E+01
C     1.869500E+01  4.563400E+01  1.630700E+01
C     2.290900E+01  4.093800E+01  1.966200E+01
C     2.014100E+01  4.679700E+01  1.792400E+01
C     2.435600E+01  4.210100E+01  2.127900E+01
C     2.158800E+01  4.796000E+01  1.954000E+01
C     2.580200E+01  4.326400E+01  2.289500E+01
C     2.303500E+01  4.912200E+01  2.115600E+01
C     2.724900E+01  4.442700E+01  2.451100E+01
C     2.448100E+01  5.028500E+01  2.277300E+01
C     2.077600E+01  3.828300E+01  1.411200E+01
C     1.800900E+01  4.414200E+01  1.237300E+01
C     2.222300E+01  3.944600E+01  1.572800E+01
C     1.945500E+01  4.530500E+01  1.399000E+01
C     2.366900E+01  4.060900E+01  1.734500E+01
C     2.090200E+01  4.646800E+01  1.560600E+01
C     2.511600E+01  4.177200E+01  1.896100E+01
C     2.234800E+01  4.763100E+01  1.722200E+01
C     2.656200E+01  4.293500E+01  2.057700E+01
C     2.379500E+01  4.879400E+01  1.883900E+01
C     2.800900E+01  4.409800E+01  2.219400E+01
C     2.524100E+01  4.995700E+01  2.045500E+01
C     2.153600E+01  3.795400E+01  1.179400E+01
C     1.876900E+01  4.381300E+01  1.005600E+01
C     2.298300E+01  3.911700E+01  1.341100E+01
C     2.021500E+01  4.497600E+01  1.167200E+01
C     2.442900E+01  4.028000E+01  1.502700E+01
C     2.166200E+01  4.613900E+01  1.328800E+01
C     2.587600E+01  4.144300E+01  1.664300E+01
C     2.310800E+01  4.730200E+01  1.490500E+01
C     2.732300E+01  4.260600E+01  1.826000E+01
C     2.455500E+01  4.846500E+01  1.652100E+01
C     2.876900E+01  4.376900E+01  1.987600E+01
C     2.600100E+01  4.962800E+01  1.813700E+01
C     2.229700E+01  3.762500E+01  9.476700E+00
C     1.952900E+01  4.348400E+01  7.738000E+00
C     2.374300E+01  3.878800E+01  1.109300E+01
C     2.097500E+01  4.464700E+01  9.354300E+00
C     2.519000E+01  3.995100E+01  1.270900E+01
C     2.242200E+01  4.581000E+01  1.097100E+01
C     2.663600E+01  4.111400E+01  1.432600E+01
C     2.386800E+01  4.697300E+01  1.258700E+01
C     2.808300E+01  4.227700E+01  1.594200E+01
C     2.531500E+01  4.813600E+01  1.420300E+01
C     2.952900E+01  4.344000E+01  1.755800E+01
C     2.676200E+01  4.929900E+01  1.582000E+01
C     2.305700E+01  3.729700E+01  7.159000E+00
C     2.028900E+01  4.315600E+01  5.420300E+00
C     2.450300E+01  3.846000E+01  8.775400E+00
C     2.173600E+01  4.431900E+01  7.036600E+00
C     2.595000E+01  3.962300E+01  1.039200E+01
C     2.318200E+01  4.548200E+01  8.652900E+00
C     2.739600E+01  4.078600E+01  1.200800E+01
C     2.462900E+01  4.664500E+01  1.026900E+01
C     2.884300E+01  4.194900E+01  1.362400E+01
C     2.607500E+01  4.780800E+01  1.188600E+01
C     3.028900E+01  4.311200E+01  1.524100E+01
C     2.752200E+01  4.897100E+01  1.350200E+01
C     2.381700E+01  3.696800E+01  4.841400E+00
C     2.104900E+01  4.282700E+01  3.102700E+00
C     2.526300E+01  3.813100E+01  6.457700E+00
C     2.249600E+01  4.399000E+01  4.719000E+00
C     2.671000E+01  3.929400E+01  8.074000E+00
C     2.394200E+01  4.515300E+01  6.335300E+00
C     2.815700E+01  4.045700E+01  9.690300E+00
C     2.538900E+01  4.631600E+01  7.951600E+00
C     2.960300E+01  4.162000E+01  1.130700E+01
C     2.683500E+01  4.747900E+01  9.567900E+00
C     3.105000E+01  4.278300E+01  1.292300E+01
C     2.828200E+01  4.864200E+01  1.118400E+01
C     1.863200E+01  4.154100E+01  1.556000E+01
C     1.586500E+01  4.740000E+01  1.382200E+01
C     2.007900E+01  4.270400E+01  1.717700E+01
C     1.731100E+01  4.856300E+01  1.543800E+01
C     2.152500E+01  4.386700E+01  1.879300E+01
C     1.875800E+01  4.972600E+01  1.705400E+01
C     2.297200E+01  4.503000E+01  2.040900E+01
C     2.020400E+01  5.088900E+01  1.867100E+01
C     2.441800E+01  4.619300E+01  2.202600E+01
C     2.165100E+01  5.205200E+01  2.028700E+01
C     2.586500E+01  4.735600E+01  2.364200E+01
C     2.309700E+01  5.321500E+01  2.190300E+01
C     1.939200E+01  4.121200E+01  1.324300E+01
C     1.662500E+01  4.707100E+01  1.150400E+01
C     2.083900E+01  4.237500E+01  1.485900E+01
C     1.807100E+01  4.823400E+01  1.312000E+01
C     2.228500E+01  4.353800E+01  1.647500E+01
C     1.951800E+01  4.939700E+01  1.473700E+01
C     2.373200E+01  4.470100E+01  1.809200E+01
C     2.096400E+01  5.056000E+01  1.635300E+01
C     2.517900E+01  4.586400E+01  1.970800E+01
C     2.241100E+01  5.172300E+01  1.796900E+01
C     2.662500E+01  4.702700E+01  2.132400E+01
C     2.385700E+01  5.288600E+01  1.958600E+01
C     2.015300E+01  4.088400E+01  1.092500E+01
C     1.738500E+01  4.674300E+01  9.186300E+00
C     2.159900E+01  4.204700E+01  1.254100E+01
C     1.883100E+01  4.790600E+01  1.080300E+01
C     2.304600E+01  4.321000E+01  1.415800E+01
C     2.027800E+01  4.906900E+01  1.241900E+01
C     2.449200E+01  4.437300E+01  1.577400E+01
C     2.172400E+01  5.023200E+01  1.403500E+01
C     2.593900E+01  4.553600E+01  1.739000E+01
C     2.317100E+01  5.139500E+01  1.565200E+01
C     2.738500E+01  4.669900E+01  1.900700E+01
C     2.461800E+01  5.255800E+01  1.726800E+01
C     2.091300E+01  4.055500E+01  8.607400E+00
C     1.814500E+01  4.641400E+01  6.868600E+00
C     2.235900E+01  4.171800E+01  1.022400E+01
C     1.959200E+01  4.757700E+01  8.485000E+00
C     2.380600E+01  4.288100E+01  1.184000E+01
C     2.103800E+01  4.874000E+01  1.010100E+01
C     2.525200E+01  4.404400E+01  1.345600E+01
C     2.248500E+01  4.990300E+01  1.171800E+01
C     2.669900E+01  4.520700E+01  1.507300E+01
C     2.393100E+01  5.106600E+01  1.333400E+01
C     2.814500E+01  4.637000E+01  1.668900E+01
C     2.537800E+01  5.222900E+01  1.495000E+01
C     2.167300E+01  4.022600E+01  6.289700E+00
C     1.890500E+01  4.608500E+01  4.551000E+00
C     2.311900E+01  4.138900E+01  7.906000E+00
C     2.035200E+01  4.724800E+01  6.167300E+00
C     2.456600E+01  4.255200E+01  9.522300E+00
C     2.179800E+01  4.841100E+01  7.783600E+00
C     2.601300E+01  4.371500E+01  1.113900E+01
C     2.324500E+01  4.957400E+01  9.399900E+00
C     2.745900E+01  4.487800E+01  1.275500E+01
C     2.469100E+01  5.073700E+01  1.101600E+01
C     2.890600E+01  4.604100E+01  1.437100E+01
C     2.613800E+01  5.190000E+01  1.263300E+01
C     2.243300E+01  3.989800E+01  3.972000E+00
C     1.966500E+01  4.575600E+01  2.233300E+00
C     2.388000E+01  4.106000E+01  5.588300E+00
C     2.111200E+01  4.691900E+01  3.849600E+00
C     2.532600E+01  4.222300E+01  7.204600E+00
C     2.255800E+01  4.808200E+01  5.465900E+00
C     2.677300E+01  4.338600E+01  8.820900E+00
C     2.400500E+01  4.924500E+01  7.082200E+00
C     2.821900E+01  4.454900E+01  1.043700E+01
C     2.545100E+01  5.040800E+01  8.698500E+00
C     2.966600E+01  4.571200E+01  1.205400E+01
C     2.689800E+01  5.157100E+01  1.031500E+01
C     2.123400E+01  3.927700E+01  1.673500E+01
C     1.846600E+01  4.513600E+01  1.499600E+01
C     2.268000E+01  4.044000E+01  1.835100E+01
C     1.991300E+01  4.629900E+01  1.661200E+01
C     2.412700E+01  4.160300E+01  1.996700E+01
C     2.135900E+01  4.746200E+01  1.822900E+01
C     2.557300E+01  4.276600E+01  2.158400E+01
C     2.280600E+01  4.862500E+01  1.984500E+01
C     2.702000E+01  4.392900E+01  2.320000E+01
C     2.425200E+01  4.978800E+01  2.146100E+01
C     2.846700E+01  4.509200E+01  2.481600E+01
C     2.569900E+01  5.095100E+01  2.307800E+01
C     2.199400E+01  3.894900E+01  1.441700E+01
C     1.922600E+01  4.480800E+01  1.267800E+01
C     2.344100E+01  4.011200E+01  1.603300E+01
C     2.067300E+01  4.597100E+01  1.429500E+01
C     2.488700E+01  4.127500E+01  1.765000E+01
C     2.211900E+01  4.713400E+01  1.591100E+01
C     2.633400E+01  4.243800E+01  1.926600E+01
C     2.356600E+01  4.829700E+01  1.752700E+01
C     2.778000E+01  4.360100E+01  2.088200E+01
C     2.501200E+01  4.946000E+01  1.914400E+01
C     2.922700E+01  4.476400E+01  2.249900E+01
C     2.645900E+01  5.062300E+01  2.076000E+01
C     2.275400E+01  3.862000E+01  1.209900E+01
C     1.998600E+01  4.447900E+01  1.036100E+01
C     2.420100E+01  3.978300E+01  1.371600E+01
C     2.143300E+01  4.564200E+01  1.197700E+01
C     2.564700E+01  4.094600E+01  1.533200E+01
C     2.288000E+01  4.680500E+01  1.359300E+01
C     2.709400E+01  4.210900E+01  1.694800E+01
C     2.432600E+01  4.796800E+01  1.521000E+01
C     2.854000E+01  4.327200E+01  1.856500E+01
C     2.577300E+01  4.913100E+01  1.682600E+01
C     2.998700E+01  4.443500E+01  2.018100E+01
C     2.721900E+01  5.029400E+01  1.844200E+01
C     2.351400E+01  3.829100E+01  9.781700E+00
C     2.074700E+01  4.415000E+01  8.043000E+00
C     2.496100E+01  3.945400E+01  1.139800E+01
C     2.219300E+01  4.531300E+01  9.659300E+00
C     2.640700E+01  4.061700E+01  1.301400E+01
C     2.364000E+01  4.647600E+01  1.127600E+01
C     2.785400E+01  4.178000E+01  1.463100E+01
C     2.508600E+01  4.763900E+01  1.289200E+01
C     2.930100E+01  4.294300E+01  1.624700E+01
C     2.653300E+01  4.880200E+01  1.450800E+01
C     3.074700E+01  4.410600E+01  1.786300E+01
C     2.797900E+01  4.996500E+01  1.612500E+01
C     2.427400E+01  3.796200E+01  7.464000E+00
C     2.150700E+01  4.382100E+01  5.725300E+00
C     2.572100E+01  3.912500E+01  9.080300E+00
C     2.295300E+01  4.498400E+01  7.341600E+00
C     2.716800E+01  4.028800E+01  1.069700E+01
C     2.440000E+01  4.614700E+01  8.957900E+00
C     2.861400E+01  4.145100E+01  1.231300E+01
C     2.584600E+01  4.731000E+01  1.057400E+01
C     3.006100E+01  4.261400E+01  1.392900E+01
C     2.729300E+01  4.847300E+01  1.219100E+01
C     3.150700E+01  4.377700E+01  1.554600E+01
C     2.873900E+01  4.963600E+01  1.380700E+01
C     2.503500E+01  3.763400E+01  5.146400E+00
C     2.226700E+01  4.349300E+01  3.407600E+00
C     2.648100E+01  3.879700E+01  6.762700E+00
C     2.371300E+01  4.465600E+01  5.023900E+00
C     2.792800E+01  3.996000E+01  8.379000E+00
C     2.516000E+01  4.581900E+01  6.640200E+00
C     2.937400E+01  4.112300E+01  9.995300E+00
C     2.660700E+01  4.698200E+01  8.256600E+00
C     3.082100E+01  4.228600E+01  1.161200E+01
C     2.805300E+01  4.814500E+01  9.872900E+00
C     3.226700E+01  4.344900E+01  1.322800E+01
C     2.950000E+01  4.930800E+01  1.148900E+01
C     1.962100E+01  4.171000E+01  1.455400E+01
C     1.685300E+01  4.756900E+01  1.281500E+01
C     2.106800E+01  4.287300E+01  1.617000E+01
C     1.830000E+01  4.873200E+01  1.443200E+01
C     2.251400E+01  4.403600E+01  1.778700E+01
C     1.974700E+01  4.989500E+01  1.604800E+01
C     2.396100E+01  4.519900E+01  1.940300E+01
C     2.119300E+01  5.105800E+01  1.766400E+01
C     2.540700E+01  4.636200E+01  2.101900E+01
C     2.264000E+01  5.222000E+01  1.928100E+01
C     2.685400E+01  4.752500E+01  2.263600E+01
C     2.408600E+01  5.338300E+01  2.089700E+01
C     2.038100E+01  4.138100E+01  1.223600E+01
C     1.761400E+01  4.724000E+01  1.049800E+01
C     2.182800E+01  4.254400E+01  1.385300E+01
C     1.906000E+01  4.840300E+01  1.211400E+01
C     2.327400E+01  4.370700E+01  1.546900E+01
C     2.050700E+01  4.956600E+01  1.373000E+01
C     2.472100E+01  4.487000E+01  1.708500E+01
C     2.195300E+01  5.072900E+01  1.534700E+01
C     2.616800E+01  4.603300E+01  1.870200E+01
C     2.340000E+01  5.189200E+01  1.696300E+01
C     2.761400E+01  4.719600E+01  2.031800E+01
C     2.484600E+01  5.305500E+01  1.857900E+01
C     2.114100E+01  4.105200E+01  9.918700E+00
C     1.837400E+01  4.691100E+01  8.180000E+00
C     2.258800E+01  4.221500E+01  1.153500E+01
C     1.982000E+01  4.807400E+01  9.796300E+00
C     2.403500E+01  4.337800E+01  1.315100E+01
C     2.126700E+01  4.923700E+01  1.141300E+01
C     2.548100E+01  4.454100E+01  1.476800E+01
C     2.271300E+01  5.040000E+01  1.302900E+01
C     2.692800E+01  4.570400E+01  1.638400E+01
C     2.416000E+01  5.156300E+01  1.464500E+01
C     2.837400E+01  4.686700E+01  1.800000E+01
C     2.560700E+01  5.272600E+01  1.626200E+01
C     2.190200E+01  4.072300E+01  7.601000E+00
C     1.913400E+01  4.658200E+01  5.862300E+00
C     2.334800E+01  4.188600E+01  9.217300E+00
C     2.058000E+01  4.774500E+01  7.478600E+00
C     2.479500E+01  4.304900E+01  1.083400E+01
C     2.202700E+01  4.890800E+01  9.094900E+00
C     2.624100E+01  4.421200E+01  1.245000E+01
C     2.347400E+01  5.007100E+01  1.071100E+01
C     2.768800E+01  4.537500E+01  1.406600E+01
C     2.492000E+01  5.123400E+01  1.232800E+01
C     2.913400E+01  4.653800E+01  1.568300E+01
C     2.636700E+01  5.239700E+01  1.394400E+01
C     2.266200E+01  4.039500E+01  5.283300E+00
C     1.989400E+01  4.625400E+01  3.544600E+00
C     2.410800E+01  4.155800E+01  6.899600E+00
C     2.134100E+01  4.741700E+01  5.160900E+00
C     2.555500E+01  4.272100E+01  8.516000E+00
C     2.278700E+01  4.858000E+01  6.777200E+00
C     2.700100E+01  4.388400E+01  1.013200E+01
C     2.423400E+01  4.974300E+01  8.393500E+00
C     2.844800E+01  4.504700E+01  1.174900E+01
C     2.568000E+01  5.090600E+01  1.001000E+01
C     2.989500E+01  4.621000E+01  1.336500E+01
C     2.712700E+01  5.206900E+01  1.162600E+01
C     2.342200E+01  4.006600E+01  2.965700E+00
C     2.065400E+01  4.592500E+01  1.226900E+00
C     2.486900E+01  4.122900E+01  4.582000E+00
C     2.210100E+01  4.708800E+01  2.843300E+00
C     2.631500E+01  4.239200E+01  6.198300E+00
C     2.354700E+01  4.825100E+01  4.459600E+00
C     2.776200E+01  4.355500E+01  7.814600E+00
C     2.499400E+01  4.941400E+01  6.075900E+00
C     2.920800E+01  4.471800E+01  9.430900E+00
C     2.644000E+01  5.057700E+01  7.692200E+00
C     3.065500E+01  4.588100E+01  1.104700E+01
C     2.788700E+01  5.174000E+01  9.308500E+00
C     1.999400E+01  0.000000E+00  1.584900E+01
C     2.035300E+01  3.651200E-01  9.159400E+00
C     1.814200E+01  1.620500E+00  1.583800E+01
C     1.850000E+01  1.985600E+00  9.148600E+00
C     1.628900E+01  3.241000E+00  1.582700E+01
C     1.664800E+01  3.606100E+00  9.137800E+00
C     1.443700E+01  4.861500E+00  1.581600E+01
C     1.479500E+01  5.226600E+00  9.127000E+00
C     1.258500E+01  6.481900E+00  1.580600E+01
C     1.294300E+01  6.847100E+00  9.116200E+00
C     1.073200E+01  8.102400E+00  1.579500E+01
C     1.109100E+01  8.467500E+00  9.105400E+00
C     2.231900E+01  7.898200E-01  1.601700E+01
C     2.267800E+01  1.154900E+00  9.327100E+00
C     2.046700E+01  2.410300E+00  1.600600E+01
C     2.082500E+01  2.775400E+00  9.316300E+00
C     1.861400E+01  4.030800E+00  1.599500E+01
C     1.897300E+01  4.395900E+00  9.305500E+00
C     1.676200E+01  5.651300E+00  1.598400E+01
C     1.712000E+01  6.016400E+00  9.294700E+00
C     1.491000E+01  7.271800E+00  1.597300E+01
C     1.526800E+01  7.636900E+00  9.283900E+00
C     1.305700E+01  8.892200E+00  1.596300E+01
C     1.341600E+01  9.257400E+00  9.273100E+00
C     2.464400E+01  1.579600E+00  1.618400E+01
C     2.500300E+01  1.944800E+00  9.494800E+00
C     2.279200E+01  3.200100E+00  1.617300E+01
C     2.315000E+01  3.565200E+00  9.484000E+00
C     2.093900E+01  4.820600E+00  1.616300E+01
C     2.129800E+01  5.185700E+00  9.473200E+00
C     1.908700E+01  6.441100E+00  1.615200E+01
C     1.944500E+01  6.806200E+00  9.462400E+00
C     1.723500E+01  8.061600E+00  1.614100E+01
C     1.759300E+01  8.426700E+00  9.451600E+00
C     1.538200E+01  9.682100E+00  1.613000E+01
C     1.574100E+01  1.004700E+01  9.440800E+00
C     2.696900E+01  2.369500E+00  1.635200E+01
C     2.732800E+01  2.734600E+00  9.662400E+00
C     2.511700E+01  3.989900E+00  1.634100E+01
C     2.547500E+01  4.355100E+00  9.651600E+00
C     2.326400E+01  5.610400E+00  1.633000E+01
C     2.362300E+01  5.975500E+00  9.640800E+00
C     2.141200E+01  7.230900E+00  1.631900E+01
C     2.177000E+01  7.596000E+00  9.630000E+00
C     1.956000E+01  8.851400E+00  1.630900E+01
C     1.991800E+01  9.216500E+00  9.619200E+00
C     1.770700E+01  1.047200E+01  1.629800E+01
C     1.806600E+01  1.083700E+01  9.608400E+00
C     2.929400E+01  3.159300E+00  1.652000E+01
C     2.965300E+01  3.524400E+00  9.830100E+00
C     2.744200E+01  4.779800E+00  1.650900E+01
C     2.780000E+01  5.144900E+00  9.819300E+00
C     2.558900E+01  6.400200E+00  1.649800E+01
C     2.594800E+01  6.765400E+00  9.808500E+00
C     2.373700E+01  8.020700E+00  1.648700E+01
C     2.409500E+01  8.385800E+00  9.797700E+00
C     2.188500E+01  9.641200E+00  1.647600E+01
C     2.224300E+01  1.000600E+01  9.786900E+00
C     2.003200E+01  1.126200E+01  1.646600E+01
C     2.039100E+01  1.162700E+01  9.776100E+00
C     3.161900E+01  3.949100E+00  1.668700E+01
C     3.197800E+01  4.314200E+00  9.997800E+00
C     2.976700E+01  5.569600E+00  1.667600E+01
C     3.012500E+01  5.934700E+00  9.987000E+00
C     2.791400E+01  7.190100E+00  1.666600E+01
C     2.827300E+01  7.555200E+00  9.976200E+00
C     2.606200E+01  8.810500E+00  1.665500E+01
C     2.642000E+01  9.175700E+00  9.965400E+00
C     2.421000E+01  1.043100E+01  1.664400E+01
C     2.456800E+01  1.079600E+01  9.954600E+00
C     2.235700E+01  1.205200E+01  1.663300E+01
C     2.271600E+01  1.241700E+01  9.943800E+00
C     2.017300E+01  1.825600E-01  1.250400E+01
C     2.053200E+01  5.476800E-01  5.814700E+00
C     1.832100E+01  1.803000E+00  1.249300E+01
C     1.867900E+01  2.168200E+00  5.803900E+00
C     1.646900E+01  3.423500E+00  1.248300E+01
C     1.682700E+01  3.788600E+00  5.793100E+00
C     1.461600E+01  5.044000E+00  1.247200E+01
C     1.497500E+01  5.409100E+00  5.782300E+00
C     1.276400E+01  6.664500E+00  1.246100E+01
C     1.312200E+01  7.029600E+00  5.771500E+00
C     1.091100E+01  8.285000E+00  1.245000E+01
C     1.127000E+01  8.650100E+00  5.760700E+00
C     2.249800E+01  9.723800E-01  1.267200E+01
C     2.285700E+01  1.337500E+00  5.982300E+00
C     2.064600E+01  2.592900E+00  1.266100E+01
C     2.100400E+01  2.958000E+00  5.971500E+00
C     1.879400E+01  4.213300E+00  1.265000E+01
C     1.915200E+01  4.578500E+00  5.960700E+00
C     1.694100E+01  5.833800E+00  1.263900E+01
C     1.730000E+01  6.198900E+00  5.949900E+00
C     1.508900E+01  7.454300E+00  1.262900E+01
C     1.544700E+01  7.819400E+00  5.939100E+00
C     1.323600E+01  9.074800E+00  1.261800E+01
C     1.359500E+01  9.439900E+00  5.928300E+00
C     2.482300E+01  1.762200E+00  1.283900E+01
C     2.518200E+01  2.127300E+00  6.150000E+00
C     2.297100E+01  3.382700E+00  1.282900E+01
C     2.332900E+01  3.747800E+00  6.139200E+00
C     2.111900E+01  5.003200E+00  1.281800E+01
C     2.147700E+01  5.368300E+00  6.128400E+00
C     1.926600E+01  6.623700E+00  1.280700E+01
C     1.962500E+01  6.988800E+00  6.117600E+00
C     1.741400E+01  8.244100E+00  1.279600E+01
C     1.777200E+01  8.609300E+00  6.106800E+00
C     1.556100E+01  9.864600E+00  1.278500E+01
C     1.592000E+01  1.023000E+01  6.096000E+00
C     2.714800E+01  2.552000E+00  1.300700E+01
C     2.750700E+01  2.917100E+00  6.317700E+00
C     2.529600E+01  4.172500E+00  1.299600E+01
C     2.565400E+01  4.537600E+00  6.306900E+00
C     2.344400E+01  5.793000E+00  1.298600E+01
C     2.380200E+01  6.158100E+00  6.296100E+00
C     2.159100E+01  7.413500E+00  1.297500E+01
C     2.195000E+01  7.778600E+00  6.285300E+00
C     1.973900E+01  9.034000E+00  1.296400E+01
C     2.009700E+01  9.399100E+00  6.274500E+00
C     1.788600E+01  1.065400E+01  1.295300E+01
C     1.824500E+01  1.102000E+01  6.263700E+00
C     2.947300E+01  3.341800E+00  1.317500E+01
C     2.983200E+01  3.707000E+00  6.485400E+00
C     2.762100E+01  4.962300E+00  1.316400E+01
C     2.797900E+01  5.327400E+00  6.474600E+00
C     2.576900E+01  6.582800E+00  1.315300E+01
C     2.612700E+01  6.947900E+00  6.463800E+00
C     2.391600E+01  8.203300E+00  1.314200E+01
C     2.427500E+01  8.568400E+00  6.453000E+00
C     2.206400E+01  9.823800E+00  1.313200E+01
C     2.242200E+01  1.018900E+01  6.442200E+00
C     2.021100E+01  1.144400E+01  1.312100E+01
C     2.057000E+01  1.180900E+01  6.431400E+00
C     3.179800E+01  4.131700E+00  1.334300E+01
C     3.215700E+01  4.496800E+00  6.653100E+00
C     2.994600E+01  5.752100E+00  1.333200E+01
C     3.030400E+01  6.117300E+00  6.642300E+00
C     2.809400E+01  7.372600E+00  1.332100E+01
C     2.845200E+01  7.737700E+00  6.631500E+00
C     2.624100E+01  8.993100E+00  1.331000E+01
C     2.660000E+01  9.358200E+00  6.620700E+00
C     2.438900E+01  1.061400E+01  1.329900E+01
C     2.474700E+01  1.097900E+01  6.609900E+00
C     2.253600E+01  1.223400E+01  1.328900E+01
C     2.289500E+01  1.259900E+01  6.599100E+00
C     1.953400E+01  1.343600E+00  1.589800E+01
C     1.989300E+01  1.708700E+00  9.208100E+00
C     1.768200E+01  2.964100E+00  1.588700E+01
C     1.804000E+01  3.329200E+00  9.197300E+00
C     1.583000E+01  4.584600E+00  1.587600E+01
C     1.618800E+01  4.949700E+00  9.186500E+00
C     1.397700E+01  6.205100E+00  1.586500E+01
C     1.433600E+01  6.570200E+00  9.175700E+00
C     1.212500E+01  7.825500E+00  1.585400E+01
C     1.248300E+01  8.190700E+00  9.164900E+00
C     1.027200E+01  9.446000E+00  1.584400E+01
C     1.063100E+01  9.811100E+00  9.154100E+00
C     2.185900E+01  2.133400E+00  1.606500E+01
C     2.221800E+01  2.498500E+00  9.375800E+00
C     2.000700E+01  3.753900E+00  1.605400E+01
C     2.036500E+01  4.119000E+00  9.365000E+00
C     1.815500E+01  5.374400E+00  1.604400E+01
C     1.851300E+01  5.739500E+00  9.354200E+00
C     1.630200E+01  6.994900E+00  1.603300E+01
C     1.666100E+01  7.360000E+00  9.343400E+00
C     1.445000E+01  8.615400E+00  1.602200E+01
C     1.480800E+01  8.980500E+00  9.332600E+00
C     1.259700E+01  1.023600E+01  1.601100E+01
C     1.295600E+01  1.060100E+01  9.321800E+00
C     2.418400E+01  2.923200E+00  1.623300E+01
C     2.454300E+01  3.288400E+00  9.543400E+00
C     2.233200E+01  4.543700E+00  1.622200E+01
C     2.269000E+01  4.908800E+00  9.532600E+00
C     2.048000E+01  6.164200E+00  1.621100E+01
C     2.083800E+01  6.529300E+00  9.521800E+00
C     1.862700E+01  7.784700E+00  1.620100E+01
C     1.898600E+01  8.149800E+00  9.511000E+00
C     1.677500E+01  9.405200E+00  1.619000E+01
C     1.713300E+01  9.770300E+00  9.500200E+00
C     1.492200E+01  1.102600E+01  1.617900E+01
C     1.528100E+01  1.139100E+01  9.489400E+00
C     2.650900E+01  3.713100E+00  1.640100E+01
C     2.686800E+01  4.078200E+00  9.711100E+00
C     2.465700E+01  5.333500E+00  1.639000E+01
C     2.501500E+01  5.698700E+00  9.700300E+00
C     2.280400E+01  6.954000E+00  1.637900E+01
C     2.316300E+01  7.319100E+00  9.689500E+00
C     2.095200E+01  8.574500E+00  1.636800E+01
C     2.131000E+01  8.939600E+00  9.678700E+00
C     1.910000E+01  1.019500E+01  1.635700E+01
C     1.945800E+01  1.056000E+01  9.667900E+00
C     1.724700E+01  1.181500E+01  1.634700E+01
C     1.760600E+01  1.218100E+01  9.657100E+00
C     2.883400E+01  4.502900E+00  1.656800E+01
C     2.919300E+01  4.868000E+00  9.878800E+00
C     2.698200E+01  6.123400E+00  1.655700E+01
C     2.734000E+01  6.488500E+00  9.868000E+00
C     2.512900E+01  7.743800E+00  1.654700E+01
C     2.548800E+01  8.109000E+00  9.857200E+00
C     2.327700E+01  9.364300E+00  1.653600E+01
C     2.363500E+01  9.729400E+00  9.846400E+00
C     2.142500E+01  1.098500E+01  1.652500E+01
C     2.178300E+01  1.135000E+01  9.835600E+00
C     1.957200E+01  1.260500E+01  1.651400E+01
C     1.993100E+01  1.297000E+01  9.824800E+00
C     3.115900E+01  5.292700E+00  1.673600E+01
C     3.151800E+01  5.657800E+00  1.004600E+01
C     2.930700E+01  6.913200E+00  1.672500E+01
C     2.966500E+01  7.278300E+00  1.003600E+01
C     2.745400E+01  8.533700E+00  1.671400E+01
C     2.781300E+01  8.898800E+00  1.002500E+01
C     2.560200E+01  1.015400E+01  1.670400E+01
C     2.596000E+01  1.051900E+01  1.001400E+01
C     2.375000E+01  1.177500E+01  1.669300E+01
C     2.410800E+01  1.214000E+01  1.000300E+01
C     2.189700E+01  1.339500E+01  1.668200E+01
C     2.225600E+01  1.376000E+01  9.992500E+00
C     2.110600E+01  1.249300E+00  1.261200E+01
C     2.146400E+01  1.614400E+00  5.922900E+00
C     1.925400E+01  2.869800E+00  1.260200E+01
C     1.961200E+01  3.234900E+00  5.912100E+00
C     1.740100E+01  4.490200E+00  1.259100E+01
C     1.776000E+01  4.855400E+00  5.901300E+00
C     1.554900E+01  6.110700E+00  1.258000E+01
C     1.590700E+01  6.475800E+00  5.890500E+00
C     1.369600E+01  7.731200E+00  1.256900E+01
C     1.405500E+01  8.096300E+00  5.879700E+00
C     1.184400E+01  9.351700E+00  1.255800E+01
C     1.220200E+01  9.716800E+00  5.868900E+00
C     2.343100E+01  2.039100E+00  1.278000E+01
C     2.378900E+01  2.404200E+00  6.090500E+00
C     2.157900E+01  3.659600E+00  1.276900E+01
C     2.193700E+01  4.024700E+00  6.079700E+00
C     1.972600E+01  5.280100E+00  1.275800E+01
C     2.008500E+01  5.645200E+00  6.068900E+00
C     1.787400E+01  6.900500E+00  1.274800E+01
C     1.823200E+01  7.265700E+00  6.058100E+00
C     1.602100E+01  8.521000E+00  1.273700E+01
C     1.638000E+01  8.886100E+00  6.047300E+00
C     1.416900E+01  1.014200E+01  1.272600E+01
C     1.452700E+01  1.050700E+01  6.036500E+00
C     2.575600E+01  2.828900E+00  1.294800E+01
C     2.611400E+01  3.194000E+00  6.258200E+00
C     2.390400E+01  4.449400E+00  1.293700E+01
C     2.426200E+01  4.814500E+00  6.247400E+00
C     2.205100E+01  6.069900E+00  1.292600E+01
C     2.241000E+01  6.435000E+00  6.236600E+00
C     2.019900E+01  7.690400E+00  1.291500E+01
C     2.055700E+01  8.055500E+00  6.225800E+00
C     1.834600E+01  9.310800E+00  1.290400E+01
C     1.870500E+01  9.676000E+00  6.215000E+00
C     1.649400E+01  1.093100E+01  1.289400E+01
C     1.685200E+01  1.129600E+01  6.204200E+00
C     2.808100E+01  3.618700E+00  1.311500E+01
C     2.843900E+01  3.983800E+00  6.425900E+00
C     2.622900E+01  5.239200E+00  1.310500E+01
C     2.658700E+01  5.604300E+00  6.415100E+00
C     2.437600E+01  6.859700E+00  1.309400E+01
C     2.473500E+01  7.224800E+00  6.404300E+00
C     2.252400E+01  8.480200E+00  1.308300E+01
C     2.288200E+01  8.845300E+00  6.393500E+00
C     2.067100E+01  1.010100E+01  1.307200E+01
C     2.103000E+01  1.046600E+01  6.382700E+00
C     1.881900E+01  1.172100E+01  1.306100E+01
C     1.917700E+01  1.208600E+01  6.371900E+00
C     3.040600E+01  4.408500E+00  1.328300E+01
C     3.076400E+01  4.773700E+00  6.593600E+00
C     2.855400E+01  6.029000E+00  1.327200E+01
C     2.891200E+01  6.394100E+00  6.582800E+00
C     2.670100E+01  7.649500E+00  1.326100E+01
C     2.706000E+01  8.014600E+00  6.572000E+00
C     2.484900E+01  9.270000E+00  1.325100E+01
C     2.520700E+01  9.635100E+00  6.561200E+00
C     2.299600E+01  1.089000E+01  1.324000E+01
C     2.335500E+01  1.125600E+01  6.550400E+00
C     2.114400E+01  1.251100E+01  1.322900E+01
C     2.150200E+01  1.287600E+01  6.539600E+00
C     3.273100E+01  5.198400E+00  1.345100E+01
C     3.308900E+01  5.563500E+00  6.761200E+00
C     3.087900E+01  6.818800E+00  1.344000E+01
C     3.123700E+01  7.184000E+00  6.750400E+00
C     2.902600E+01  8.439300E+00  1.342900E+01
C     2.938500E+01  8.804400E+00  6.739600E+00
C     2.717400E+01  1.006000E+01  1.341800E+01
C     2.753200E+01  1.042500E+01  6.728800E+00
C     2.532100E+01  1.168000E+01  1.340800E+01
C     2.568000E+01  1.204500E+01  6.718000E+00
C     2.346900E+01  1.330100E+01  1.339700E+01
C     2.382700E+01  1.366600E+01  6.707200E+00
